# Supplementary material for: Alkylated green fluorescent protein chromophores: dynamics in the gas phase and in aqueous solution
Source: Royal Society of Chemistry journal article supplement (doi:10.1039/d3cp03250g), 2023-01-01
Supplement: d3cp03250g1.pdf [file d3cp03250g1.pdf]

Electronic Supplementary Information for

**Alkylated Green Fluorescent Protein Chromophores:  
Dynamics in the Gas Phase and in Aqueous Solution**

Eleanor K. Ashworth, Min-Hsien Kao, Cate S. Anstöter, Gerard Riesco-Llach, Lluís Blancafort,  
Kyril Solntsev, Stephen R. Meech, Jan R. R. Verlet and James N. Bull

# 1 Analysis of the $p\text{HBDI}^-$ molecular dynamics trajectory

The  $S_0$ ,  $S_1$ , and  $T_1$  TD-DFT energies along the trajectory are plotted in Fig. S1. The relative energies of the three states are shown in panel (a), while (b) shows the  $S_1/S_0$  and  $S_1/T_1$  energy difference. In the example, the trajectory was propagated for 3395 fs, and the  $T_1$  single-point energies (SCF calculations with triplet multiplicity) were calculated every 10 fs. The trajectory enters the P-trap at  $\approx 1330$  fs, when the P-twist angle  $\phi$  reaches  $90^\circ$ . The average  $S_1/T_1$  energy difference during the remaining trajectory is  $0.32 \pm 0.25$  eV. The spin-orbit coupling (SOC) matrix element, and the  $S_1/T_1$  energy difference at the MS-CASPT2 level, were calculated at 10 points with the smallest  $S_1/T_1$  energy difference, and the results provided in Table S1.

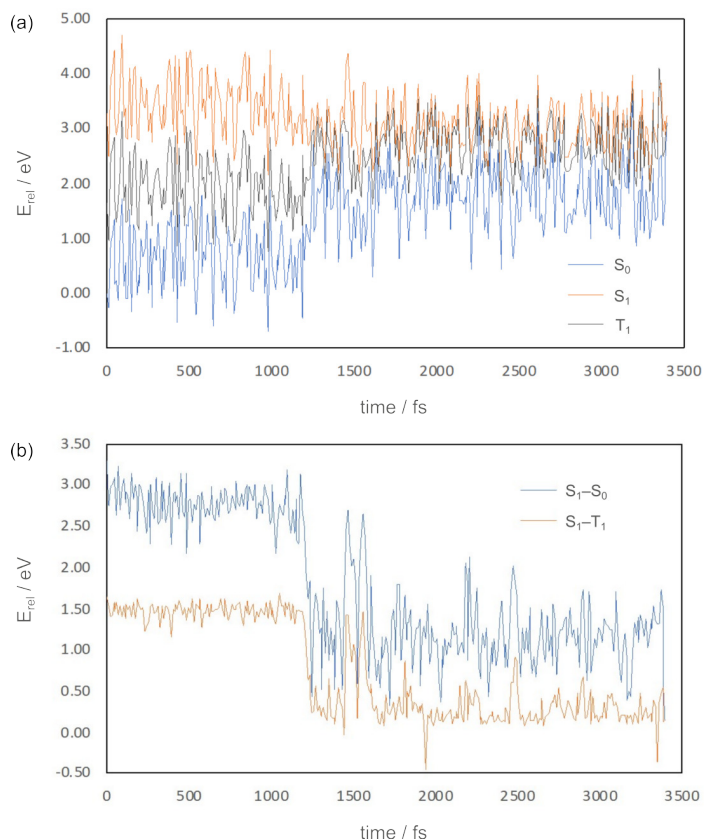

**Fig. S1** TD-DFT molecular dynamics: (a) relative  $S_0$ ,  $S_1$ , and  $T_1$  energies along an example molecular dynamics trajectory for  $p\text{HBDI}^-$ , and (b)  $S_1/S_0$  and  $S_1/T_1$  energy differences along that same trajectory.

| Time / fs | $\phi$      | $\Delta E_{TD-DFT} / \text{eV}$ | $\Delta E_{MS-CASPT2} / \text{eV}$ | SOC / $\text{cm}^{-1}$ |
|-----------|-------------|---------------------------------|------------------------------------|------------------------|
| 1390      | $113^\circ$ | 0.09                            | 0.02                               | 0.17                   |
| 1440      | $129^\circ$ | -0.03                           | -0.18                              | 0.11                   |
| 1690      | $70^\circ$  | 0.09                            | 0.01                               | 0.13                   |
| 1990      | $93^\circ$  | 0.08                            | 0.01                               | 0.15                   |
| 2450      | $104^\circ$ | 0.10                            | 0.00                               | 0.18                   |
| 2540      | $95^\circ$  | 0.08                            | 0.00                               | 0.10                   |
| 2620      | $97^\circ$  | 0.09                            | -0.12                              | 0.18                   |
| 2660      | $85^\circ$  | 0.09                            | -0.01                              | 0.14                   |
| 3200      | $86^\circ$  | 0.09                            | -0.01                              | 0.16                   |
| 3230      | $85^\circ$  | 0.09                            | 0.01                               | 0.19                   |

**Table S1** MS-CASPT2  $S_1/T_1$  energy difference (in eV), spin-orbit coupling (SOC) elements (in  $\text{cm}^{-1}$ ), and P-twist angle,  $\phi$ , for 10 points along the trajectory with the lowest  $S_1/T_1$  TD-DFT energy difference (in eV).

## 2 Fluorescence

Fluorescence excitation and emission spectra for  $p\text{HBDI}^-$ ,  $26\text{Me}^-$ ,  $35\text{Me}^-$ , and  $35\text{Bu}^-$  in ethanol were recorded at  $T \approx 77\text{ K}$  (samples immersed in a liquid nitrogen bath) using an Edinburgh Instruments FS5 spectrofluorometer. Time-resolved fluorescence measurements (time-correlated single-photon counting) at  $T \approx 77\text{ K}$  were performed using pulses of light from an EPL-485 module delivering a wavelength of  $485 \pm 8\text{ nm}$  with an instrument response function of  $\approx 150\text{ ps}$  (FWHM).

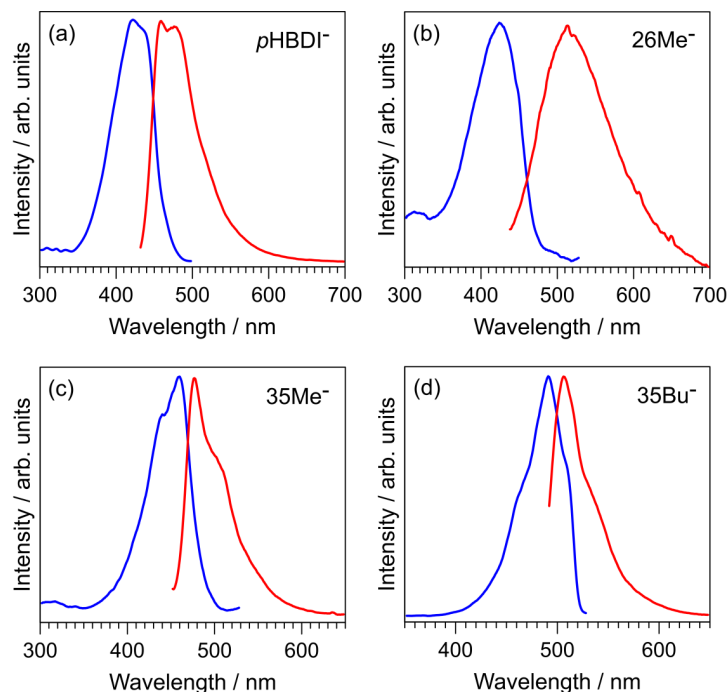

**Fig. S2** Fluorescence excitation (blue) and emission (red) spectra recorded in ethanol at  $T \approx 77\text{ K}$  for: (a)  $p\text{HBDI}^-$ , (b)  $26\text{Me}^-$ , (c)  $35\text{Me}^-$ , and (d)  $35\text{Bu}^-$ .

|                  | Water |       |      | Ethanol         |                 |
|------------------|-------|-------|------|-----------------|-----------------|
|                  | 300 K | 300 K | 77 K | $\tau_1$        | $\tau_2$        |
| $p\text{HBDI}^-$ | 3108  | 2514  | 1919 | $0.36 \pm 0.01$ | $2.69 \pm 0.01$ |
| $26\text{Me}^-$  | 4334  | 3548  | 4036 | $0.26 \pm 0.01$ | $3.07 \pm 0.03$ |
| $35\text{Me}^-$  | 2614  | 1340  | 781  | -               | $2.68 \pm 0.02$ |
| $35\text{Bu}^-$  | 991   | 341   | 643  | -               | $2.91 \pm 0.01$ |

**Table S2** Stokes shifts (in  $\text{cm}^{-1}$ ) for  $p\text{HBDI}^-$ ,  $26\text{Me}^-$ ,  $35\text{Me}^-$ , and  $35\text{Bu}^-$  in water ( $T = 300\text{ K}$ ) and ethanol ( $T = 300\text{ K}$  and  $T \approx 77\text{ K}$ ). Also included are the fitted excited-state lifetimes (in ns) from time-resolved fluorescence measurements in ethanol at  $T \approx 77\text{ K}$ . Suitability of single- or double-exponential fits was determined by examining the fit residuals. There was no evidence for phosphorescence or delayed fluorescence.

| Species          | $\tau_1^g$ | $\pm$ | $\tau_2^g$ | $\pm$ | $\tau_1^w$ | $\pm$ | $\tau_2^w$ | $\pm$ | $\tau_1^{\text{eth}}$ | $\tau_2^{\text{eth}}$ |
|------------------|------------|-------|------------|-------|------------|-------|------------|-------|-----------------------|-----------------------|
| $p\text{HBDI}^-$ | 0.46       | 0.07  | 4.64       | 0.39  | 0.29       | 0.04  | 1.19       | 0.18  | 0.25                  | 0.87                  |
| $26\text{Me}^-$  | 0.07       | 0.02  | 1.58       | 0.41  | 0.06       | -     | -*         | -     | 0.07                  | 0.49                  |
| $35\text{Me}^-$  | 0.47       | 0.07  | 5.53       | 0.47  | 0.45       | 0.06  | 2.34       | 0.12  | 0.44                  | 2.71                  |
| $35\text{Bu}^-$  | 1.28       | 0.16  | 9.72       | 1.11  | 0.61       | 0.17  | 3.19       | 0.30  | 0.59                  | 2.97                  |

**Table S3** Fitted excited-state lifetimes and associated errors (in ps) from gas-phase time-resolved photoelectron imaging (g), and fluorescence upconversion in water (w) and ethanol (eth, taken from Conyard *et al.*<sup>1</sup>, uncertainties not provided). \* $26\text{Me}^-$  data could not be fit to a double exponential;  $\tau_1^w$  is close to being limited by the laser cross-correlation ( $\approx 55\text{ fs}$ ).

### 3 Modelling microsolvation

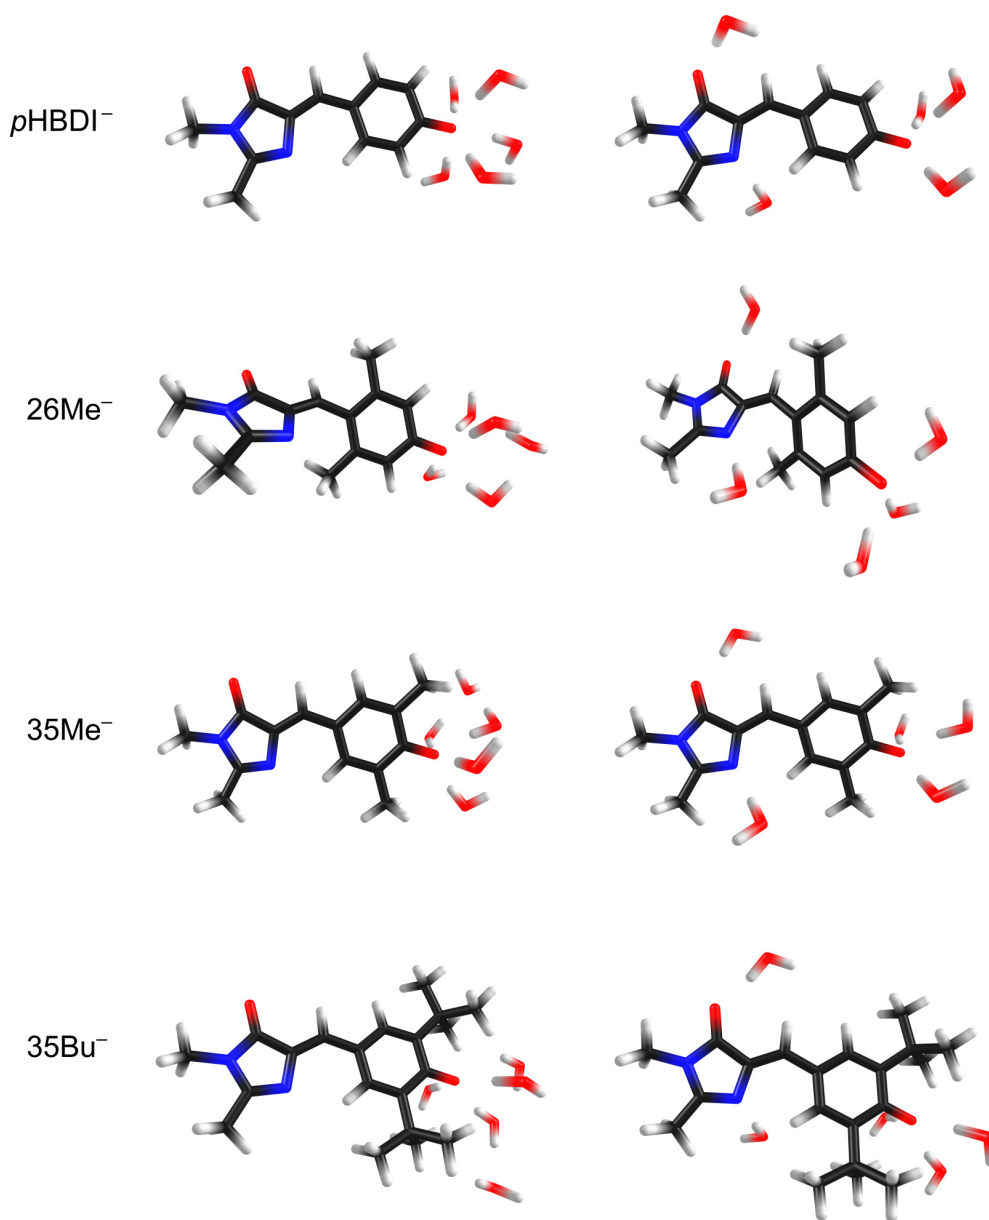

**Fig. S3** Microsolvated structures for  $p\text{HBDI}^-$ ,  $26\text{Me}^-$ ,  $35\text{Me}^-$ , and  $35\text{Bu}^-$  with five explicit water molecules – (left, s1) five water molecules around the phenoxide deprotonation site, and (right, s2) three molecules around the phenoxide deprotonation site and two around the imidazolinone ring. Computed at the MP2/aug-cc-pVDZ level of theory (including the explicit waters) with the SMD implicit solvation model. Cartesian coordinates are given in Section 5.

An intriguing property of the aqueous absorption spectra of the alkylated  $p\text{HBDI}^-$  anions (Fig. S3a) is that, compared with  $p\text{HBDI}^-$ , they show substantial red shifts (ranging from 24 nm for  $35\text{Me}^-$  to 64 nm for  $35\text{Bu}^-$ ) with the degree of alkylation (excluding  $26\text{Me}^-$ ). On the other hand, gas-phase photodissociation spectra, which are proxies for the gas-phase absorption spectra, shown negligible differences.<sup>2</sup> We previously assumed this differing environmental behaviour arose because of changes in inductive effects with alkylation.<sup>2</sup> Here, microsolvation of the target anions was modelled using the SMD implicit solvation model combined with five explicit water molecules placed in two configurations (see Fig. S3): (a) with all water molecules surrounding the phenoxide deprotonation site (1), and (b) with three molecules surrounding the phenoxide deprotonation site and two coordinated to the imidazolinone ring (2). For microsolvated  $p\text{HBDI}^-$  and  $35\text{Me}^-$ , configuration 1 is more stable (0.06 eV and 0.07 eV lower in energy, respectively), while  $26\text{Me}^-$  and  $35\text{Bu}^-$  favour configuration 2 (0.03 eV and 0.05 eV lower in energy, respectively). The preference for configuration 2 is attributed

to the twisted ground-state geometry in 26Me<sup>-</sup>, and the significant steric bulk around the phenoxide deprotonation site in 35Bu<sup>-</sup>. Calculated vertical excitation wavelengths of the lower energy microsolvated structures (STEOM-DLPNO-CCSD/aug-cc-pVDZ level of theory) reproduced the trends in the absorption spectra in (Fig. S3a), with a mean difference of about 12 nm. This result supports our original hypothesis that the strong red shift in water is, in significant part, due to inductive effects.

## 4 Dihedral angles

Dihedral angles for single bond as part of the methine bridge for *p*HBDI<sup>-</sup> and 26Me<sup>-</sup> are given in Table S4. There is a clear twisting of the dihedral angle for 26Me<sup>-</sup> upon solvation of both ends of the chromophore (see  $\varphi_2$ ).

|                            | $\varphi_g$ | $\varphi_1$ | $\varphi_2$ |
|----------------------------|-------------|-------------|-------------|
| <i>p</i> HBDI <sup>-</sup> | 0°          | 0.6°        | 6.7°        |
| 26Me <sup>-</sup>          | 19.9°       | 19.4°       | 48.1°       |

**Table S4** Computed equilibrium dihedral angles of the bridging single bond for *p*HBDI<sup>-</sup> and 26Me<sup>-</sup> in the gas phase ( $\varphi_g$ , computed at  $\omega$ B97X-D/aug-cc-pVTZ level of theory) and aqueous solution ( $\varphi_1$  and  $\varphi_2$ , computed at MP2/aug-cc-pVDZ level of theory, with the SMD implicit solvation model). The solvated structures have: (1) five water molecules around the phenoxide deprotonation site, and (2) three water molecules around the phenoxide deprotonation site and two around the imidazolinone ring. In terms of relative energies, *p*HBDI<sup>-</sup> favours solvation at site 1, while 26Me<sup>-</sup> favours solvation site 2. Structures are illustrated in Fig. S3.

## 5 Electronic structure geometries

Optimised structures ( $\omega$ B97X-D/aug-cc-pVTZ), Å

*Z*-*p*HBDI<sup>-</sup> - S<sub>0</sub>

|   |           |           |           |
|---|-----------|-----------|-----------|
| C | 4.271404  | 0.374736  | 0.000002  |
| C | 3.903653  | -1.028333 | 0.000000  |
| C | 2.604634  | -1.427705 | 0.000000  |
| C | 1.517043  | -0.509509 | 0.000000  |
| C | 1.855403  | 0.875315  | 0.000000  |
| C | 3.147473  | 1.295141  | 0.000000  |
| H | 2.372429  | -2.488749 | -0.000001 |
| H | 1.047094  | 1.594007  | -0.000001 |
| C | 0.206203  | -1.007400 | 0.000000  |
| H | 0.117225  | -2.091269 | 0.000000  |
| O | 5.453743  | 0.759860  | -0.000001 |
| C | -1.019844 | -0.383970 | 0.000000  |
| C | -2.268822 | -1.118457 | 0.000000  |
| C | -2.565719 | 1.115363  | 0.000000  |
| N | -1.284135 | 0.993195  | 0.000000  |
| N | -3.229300 | -0.096087 | 0.000000  |
| C | -3.306502 | 2.404853  | 0.000000  |
| H | -3.946965 | 2.497066  | 0.880740  |
| H | -2.586454 | 3.218717  | 0.000000  |
| H | -3.946966 | 2.497065  | -0.880739 |
| O | -2.546447 | -2.314686 | 0.000000  |
| C | -4.643493 | -0.330125 | 0.000000  |
| H | -5.122252 | 0.089997  | 0.887608  |
| H | -5.122253 | 0.090000  | -0.887606 |
| H | -4.784134 | -1.410182 | -0.000002 |
| H | 4.712182  | -1.748964 | -0.000001 |
| H | 3.387172  | 2.351713  | -0.000001 |

*Z*-*p*HBDI<sup>-</sup> - D<sub>0</sub>

|   |           |           |           |
|---|-----------|-----------|-----------|
| C | 4.224724  | 0.389961  | 0.000002  |
| C | 3.897855  | -1.032508 | -0.000002 |
| C | 2.613265  | -1.450640 | -0.000001 |
| C | 1.521037  | -0.526773 | 0.000000  |
| C | 1.816102  | 0.873972  | -0.000001 |
| C | 3.093897  | 1.313455  | -0.000001 |
| H | 2.385989  | -2.509549 | -0.000002 |
| H | 0.990087  | 1.569140  | -0.000001 |
| C | 0.209629  | -1.048408 | 0.000000  |
| H | 0.114563  | -2.128953 | 0.000000  |
| O | 5.387756  | 0.787458  | 0.000001  |
| C | -0.989474 | -0.388379 | 0.000000  |
| C | -2.281032 | -1.121640 | 0.000001  |
| C | -2.532582 | 1.099808  | 0.000000  |
| N | -1.239059 | 0.969498  | 0.000001  |
| N | -3.218585 | -0.090073 | 0.000000  |
| C | -3.245346 | 2.398617  | 0.000000  |
| H | -3.884839 | 2.486665  | 0.879770  |
| H | -2.519300 | 3.205238  | 0.000000  |
| H | -3.884838 | 2.486664  | -0.879771 |
| O | -2.526770 | -2.304577 | 0.000001  |
| C | -4.647098 | -0.290122 | -0.000001 |
| H | -5.103562 | 0.144484  | 0.888740  |
| H | -5.103562 | 0.144486  | -0.888740 |
| H | -4.822006 | -1.363435 | -0.000002 |
| H | 4.726813  | -1.726481 | -0.000003 |
| H | 3.330426  | 2.368658  | -0.000002 |

Z-pHBDI<sup>-</sup> – triplet

|   |           |           |           |
|---|-----------|-----------|-----------|
| C | 4.245797  | 0.405079  | -0.000007 |
| C | 3.925093  | -1.002810 | 0.000000  |
| C | 2.640965  | -1.452042 | -0.000001 |
| C | 1.513807  | -0.568369 | -0.000004 |
| C | 1.817182  | 0.828372  | -0.000002 |
| C | 3.105676  | 1.283084  | -0.000001 |
| H | 2.444923  | -2.518697 | 0.000001  |
| H | 0.992495  | 1.524789  | -0.000001 |
| C | 0.211165  | -1.111523 | -0.000003 |
| H | 0.117650  | -2.189806 | -0.000002 |
| O | 5.431470  | 0.824617  | 0.000010  |
| C | -1.018900 | -0.419819 | -0.000002 |
| C | -2.305670 | -1.110638 | 0.000000  |
| C | -2.544777 | 1.114084  | -0.000001 |
| N | -1.237019 | 0.928358  | -0.000003 |
| N | -3.235899 | -0.060266 | 0.000001  |
| C | -3.212672 | 2.438493  | -0.000001 |
| H | -3.847779 | 2.572868  | 0.880777  |
| H | -2.448002 | 3.210970  | -0.000002 |
| H | -3.847781 | 2.572867  | -0.880777 |
| O | -2.609516 | -2.305832 | 0.000002  |
| C | -4.656751 | -0.252466 | 0.000004  |
| H | -5.120080 | 0.183805  | 0.887630  |
| H | -5.120083 | 0.183805  | -0.887621 |
| H | -4.831572 | -1.327318 | 0.000004  |
| H | 4.757948  | -1.696002 | 0.000004  |
| H | 3.311589  | 2.347137  | 0.000002  |

E-pHBDI<sup>-</sup> – S<sub>0</sub>

|   |           |           |           |
|---|-----------|-----------|-----------|
| C | -4.246612 | 0.270218  | -0.000001 |
| C | -3.869778 | -1.131897 | -0.000001 |
| C | -2.569996 | -1.521028 | 0.000000  |
| C | -1.483437 | -0.594952 | 0.000002  |
| C | -1.832956 | 0.789324  | 0.000000  |
| C | -3.128757 | 1.196562  | -0.000001 |
| H | -2.332162 | -2.580907 | 0.000000  |
| H | -1.031599 | 1.515842  | 0.000000  |
| C | -0.184512 | -1.115695 | 0.000002  |
| H | -0.145947 | -2.202734 | 0.000002  |
| O | -5.431783 | 0.643879  | -0.000002 |
| C | 1.091898  | -0.582459 | 0.000003  |
| C | 1.583690  | 0.779932  | 0.000004  |
| C | 3.252142  | -0.742171 | -0.000001 |
| N | 2.190015  | -1.466344 | 0.000005  |
| N | 2.975740  | 0.609765  | 0.000001  |
| C | 4.649279  | -1.252793 | -0.000005 |
| H | 5.200429  | -0.913076 | 0.880681  |
| H | 4.621083  | -2.339373 | -0.000002 |
| H | 5.200421  | -0.913082 | -0.880698 |
| O | 1.053747  | 1.889519  | 0.000003  |
| C | 3.905512  | 1.700948  | -0.000003 |
| H | 4.542220  | 1.687827  | 0.887752  |
| H | 4.542214  | 1.687827  | -0.887762 |
| H | 3.316560  | 2.616885  | -0.000001 |
| H | -4.673572 | -1.857914 | -0.000003 |
| H | -3.374482 | 2.251636  | -0.000002 |

Z-26Me<sup>-</sup> – S<sub>0</sub>

|   |           |           |           |
|---|-----------|-----------|-----------|
| C | 2.382208  | -1.080471 | -0.240663 |
| C | 2.963825  | 1.022083  | 0.305348  |
| C | 1.233401  | -0.200224 | -0.097524 |
| C | 3.862128  | 2.156387  | 0.649276  |
| H | 4.557922  | 2.375394  | -0.164629 |
| H | 3.253094  | 3.036136  | 0.839127  |
| H | 4.458472  | 1.938439  | 1.538830  |
| C | 4.834799  | -0.655851 | 0.000542  |
| H | 5.311469  | -0.528199 | 0.975244  |
| H | 4.834380  | -1.714158 | -0.256675 |
| H | 5.414425  | -0.108756 | -0.746578 |
| N | 1.680251  | 1.083401  | 0.244933  |
| N | 3.465223  | -0.233138 | 0.021606  |
| C | -0.041636 | -0.721497 | -0.185107 |
| H | 0.044335  | -1.797448 | -0.294339 |
| C | -1.369167 | -0.258304 | -0.124619 |
| C | -1.811451 | 1.098858  | -0.322516 |
| C | -2.394865 | -1.241976 | 0.137759  |
| C | -3.127511 | 1.426357  | -0.189482 |
| C | -3.698497 | -0.882686 | 0.288435  |
| C | -4.159887 | 0.480128  | 0.160333  |
| H | -3.453457 | 2.443221  | -0.376649 |
| H | -4.451614 | -1.628585 | 0.515160  |
| O | 2.499739  | -2.272151 | -0.513073 |
| C | -2.047621 | -2.702892 | 0.296349  |
| H | -1.577365 | -3.107930 | -0.602109 |
| H | -1.355919 | -2.871270 | 1.123240  |
| H | -2.951547 | -3.278954 | 0.488087  |
| C | -0.865785 | 2.175441  | -0.776727 |
| H | -0.199200 | 2.489564  | 0.022171  |
| H | -0.218622 | 1.817556  | -1.578554 |
| H | -1.430849 | 3.034584  | -1.137970 |
| O | -5.351426 | 0.804208  | 0.310753  |

Z-26Me<sup>-</sup> – D<sub>0</sub>

|   |           |           |           |
|---|-----------|-----------|-----------|
| C | 2.451959  | -1.005920 | -0.429101 |
| C | 2.712406  | 0.986738  | 0.559498  |
| C | 1.162019  | -0.296776 | -0.180756 |
| C | 3.443862  | 2.118716  | 1.176987  |
| H | 4.140478  | 2.561617  | 0.463495  |
| H | 2.730657  | 2.870231  | 1.500128  |
| H | 4.025644  | 1.778755  | 2.035106  |
| C | 4.815258  | -0.343945 | 0.066618  |
| H | 5.211798  | -0.364315 | 1.081437  |
| H | 4.982985  | -1.312601 | -0.398503 |
| H | 5.336864  | 0.421036  | -0.507844 |
| N | 1.428846  | 0.924410  | 0.435058  |
| N | 3.391907  | -0.112071 | 0.068609  |
| C | -0.022840 | -0.868744 | -0.458410 |
| H | 0.061878  | -1.891117 | -0.811946 |
| C | -1.362362 | -0.354814 | -0.260026 |
| C | -1.750689 | 0.967310  | -0.640453 |
| C | -2.325293 | -1.259326 | 0.299954  |
| C | -3.031329 | 1.372030  | -0.398191 |
| C | -3.588560 | -0.825817 | 0.555583  |
| C | -4.013125 | 0.519706  | 0.234458  |
| H | -3.367690 | 2.357143  | -0.693707 |
| H | -4.324461 | -1.473997 | 1.012676  |
| O | 2.683594  | -2.080653 | -0.926601 |
| C | -1.928485 | -2.667293 | 0.650786  |
| H | -1.648926 | -3.235464 | -0.238437 |
| H | -1.073930 | -2.685228 | 1.327605  |
| H | -2.755390 | -3.186307 | 1.129908  |
| C | -0.815463 | 1.894590  | -1.364403 |
| H | -0.108108 | 2.347751  | -0.673269 |
| H | -0.232649 | 1.361076  | -2.115266 |
| H | -1.380690 | 2.680207  | -1.861487 |
| O | -5.162080 | 0.913917  | 0.470248  |



Z-26Me<sup>-</sup> – triplet

|   |           |           |           |
|---|-----------|-----------|-----------|
| C | 2.464772  | -1.015520 | -0.390047 |
| C | 2.769362  | 0.997126  | 0.544643  |
| C | 1.204595  | -0.326045 | -0.149719 |
| C | 3.478744  | 2.172763  | 1.107856  |
| H | 4.136219  | 2.643009  | 0.369956  |
| H | 2.738422  | 2.901021  | 1.429346  |
| H | 4.099133  | 1.900304  | 1.966776  |
| C | 4.837580  | -0.346059 | 0.039835  |
| H | 5.267384  | -0.352400 | 1.044341  |
| H | 4.978864  | -1.326978 | -0.411943 |
| H | 5.361643  | 0.401705  | -0.559830 |
| N | 1.462518  | 0.887857  | 0.433815  |
| N | 3.425815  | -0.101523 | 0.070466  |
| C | -0.042473 | -0.927290 | -0.402812 |
| H | 0.038482  | -1.992418 | -0.573311 |
| C | -1.355812 | -0.390068 | -0.229525 |
| C | -1.735628 | 0.943770  | -0.608050 |
| C | -2.392123 | -1.248109 | 0.289253  |
| C | -3.008066 | 1.390476  | -0.375047 |
| C | -3.655522 | -0.777801 | 0.499115  |
| C | -4.039247 | 0.577271  | 0.207496  |
| H | -3.295403 | 2.393183  | -0.670714 |
| H | -4.421027 | -1.421087 | 0.917989  |
| O | 2.735227  | -2.122723 | -0.865889 |
| C | -2.065978 | -2.671972 | 0.643013  |
| H | -1.791892 | -3.253338 | -0.240959 |
| H | -1.213369 | -2.720314 | 1.323193  |
| H | -2.922229 | -3.155550 | 1.112773  |
| C | -0.778463 | 1.830432  | -1.351135 |
| H | 0.000794  | 2.213490  | -0.694255 |
| H | -0.269667 | 1.261756  | -2.133103 |
| H | -1.312645 | 2.663014  | -1.809720 |
| O | -5.198163 | 1.008526  | 0.422169  |

E-26Me<sup>-</sup> – S<sub>0</sub>

|   |           |           |           |
|---|-----------|-----------|-----------|
| C | 1.797331  | -0.707459 | -0.423643 |
| C | 3.416610  | 0.698287  | 0.283300  |
| C | 1.261717  | 0.482976  | 0.206278  |
| C | 4.796096  | 1.196407  | 0.531869  |
| H | 5.364433  | 1.282261  | -0.397716 |
| H | 4.732546  | 2.175990  | 0.998467  |
| H | 5.350568  | 0.524804  | 1.192254  |
| C | 4.148215  | -1.438887 | -0.850237 |
| H | 4.821202  | -1.812370 | -0.075147 |
| H | 3.588158  | -2.273431 | -1.269511 |
| H | 4.745840  | -0.982138 | -1.642958 |
| N | 2.331907  | 1.319850  | 0.584955  |
| N | 3.185557  | -0.521006 | -0.315412 |
| C | -0.028483 | 0.978293  | 0.287656  |
| H | 0.000306  | 2.052726  | 0.441110  |
| C | -1.317557 | 0.431263  | 0.191962  |
| C | -1.685054 | -0.919718 | 0.534350  |
| C | -2.387165 | 1.318258  | -0.205763 |
| C | -2.973913 | -1.341998 | 0.391762  |
| C | -3.655070 | 0.860145  | -0.372358 |
| C | -4.039053 | -0.510917 | -0.110908 |
| H | -3.250372 | -2.344226 | 0.698630  |
| H | -4.440699 | 1.524696  | -0.713665 |
| O | 1.304476  | -1.667403 | -1.008971 |
| C | -2.109403 | 2.770945  | -0.504395 |
| H | -1.719770 | 3.294923  | 0.371847  |
| H | -1.374669 | 2.889556  | -1.302386 |
| H | -3.027856 | 3.270873  | -0.808607 |
| C | -0.703354 | -1.855469 | 1.179752  |
| H | -0.079792 | -2.339313 | 0.429350  |
| H | -0.032595 | -1.321206 | 1.854459  |
| H | -1.236886 | -2.617128 | 1.748015  |
| O | -5.202995 | -0.918930 | -0.272115 |

Z-35Me<sup>-</sup> – S<sub>0</sub>

|   |           |           |           |
|---|-----------|-----------|-----------|
| C | -2.796735 | -1.190533 | 0.000005  |
| C | -3.116488 | 1.040137  | 0.000001  |
| C | -1.555437 | -0.443684 | 0.000018  |
| C | -3.869858 | 2.322341  | -0.000009 |
| H | -4.511239 | 2.408552  | 0.880721  |
| H | -3.157648 | 3.143108  | 0.000004  |
| H | -4.511211 | 2.408555  | -0.880758 |
| C | -5.179345 | -0.426356 | -0.000026 |
| H | -5.662493 | -0.011169 | -0.887629 |
| H | -5.308842 | -1.507829 | -0.000026 |
| H | -5.662517 | -0.011166 | 0.887562  |
| N | -1.833655 | 0.930604  | 0.000016  |
| N | -3.767712 | -0.177888 | -0.000007 |
| C | -0.323262 | -1.056345 | 0.000019  |
| H | -0.403326 | -2.140876 | 0.000015  |
| C | 0.983724  | -0.548355 | 0.000018  |
| C | 1.306669  | 0.837185  | 0.000018  |
| C | 2.073929  | -1.460642 | 0.000009  |
| C | 2.592492  | 1.283022  | 0.000006  |
| C | 3.376047  | -1.065300 | -0.000003 |
| C | 3.709308  | 0.349157  | -0.000010 |
| O | -3.062857 | -2.389659 | 0.000003  |
| O | 4.892695  | 0.742852  | -0.000021 |
| H | 1.844560  | -2.523402 | 0.000010  |
| C | 4.516220  | -2.037677 | -0.000015 |
| H | 5.156817  | -1.887625 | -0.872146 |
| H | 5.156842  | -1.887618 | 0.872096  |
| H | 4.155062  | -3.067575 | -0.000006 |
| C | 2.930735  | 2.743230  | 0.000003  |
| H | 2.026896  | 3.353763  | 0.000021  |
| H | 3.535596  | 3.002657  | 0.871988  |
| H | 3.535565  | 3.002661  | -0.872002 |
| H | 0.488807  | 1.546308  | 0.000027  |

Z-35Me<sup>-</sup> – D<sub>0</sub>

|   |           |           |           |
|---|-----------|-----------|-----------|
| C | -2.804650 | -1.198142 | 0.000004  |
| C | -3.081756 | 1.021135  | 0.000002  |
| C | -1.522050 | -0.450728 | 0.000000  |
| C | -3.811115 | 2.311168  | 0.000001  |
| H | -4.451566 | 2.391871  | 0.879805  |
| H | -3.094840 | 3.126551  | 0.000001  |
| H | -4.451564 | 2.391871  | -0.879805 |
| C | -5.179692 | -0.394710 | -0.000001 |
| H | -5.641937 | 0.034217  | -0.888660 |
| H | -5.341521 | -1.470136 | 0.000001  |
| H | -5.641939 | 0.034220  | 0.888656  |
| N | -1.788226 | 0.906374  | 0.000001  |
| N | -3.754117 | -0.177699 | 0.000001  |
| C | -0.317556 | -1.097365 | -0.000003 |
| H | -0.402938 | -2.178769 | -0.000002 |
| C | 0.992755  | -0.565614 | -0.000005 |
| C | 1.271664  | 0.833506  | -0.000003 |
| C | 2.084592  | -1.483607 | -0.000002 |
| C | 2.542522  | 1.304005  | -0.000005 |
| C | 3.376445  | -1.075802 | -0.000004 |
| C | 3.673181  | 0.363846  | -0.000023 |
| O | -3.038573 | -2.384134 | 0.000002  |
| O | 4.833595  | 0.768676  | 0.000012  |
| H | 1.857618  | -2.543653 | 0.000003  |
| C | 4.533397  | -2.017971 | 0.000007  |
| H | 5.165274  | -1.846871 | -0.872191 |
| H | 5.165276  | -1.846850 | 0.872199  |
| H | 4.197986  | -3.053423 | 0.000019  |
| C | 2.866324  | 2.761054  | 0.000004  |
| H | 1.959756  | 3.362889  | 0.000016  |
| H | 3.468177  | 3.019137  | 0.872142  |
| H | 3.468163  | 3.019150  | -0.872139 |
| H | 0.435910  | 1.518084  | 0.000001  |

Z-35Me<sup>-</sup> – triplet

|   |           |           |           |
|---|-----------|-----------|-----------|
| C | -2.828792 | -1.190078 | 0.000001  |
| C | -3.091596 | 1.032694  | 0.000001  |
| C | -1.549988 | -0.485694 | 0.000002  |
| C | -3.775068 | 2.349390  | 0.000000  |
| H | -4.411726 | 2.476580  | 0.880775  |
| H | -3.019306 | 3.130648  | 0.000002  |
| H | -4.411721 | 2.476581  | -0.880780 |
| C | -5.188777 | -0.357536 | -0.000004 |
| H | -5.657295 | 0.073467  | -0.887606 |
| H | -5.351507 | -1.434343 | -0.000004 |
| H | -5.657300 | 0.073467  | 0.887595  |
| N | -1.783430 | 0.862032  | 0.000003  |
| N | -3.770345 | -0.149805 | -0.000001 |
| C | -0.314387 | -1.164031 | 0.000003  |
| H | -0.397751 | -2.243219 | 0.000002  |
| C | 0.985055  | -0.610320 | 0.000002  |
| C | 1.271086  | 0.786876  | 0.000003  |
| C | 2.114757  | -1.486768 | 0.000002  |
| C | 2.551600  | 1.269996  | 0.000001  |
| C | 3.402727  | -1.042256 | 0.000000  |
| C | 3.691097  | 0.379954  | -0.000005 |
| O | -3.120924 | -2.388541 | 0.000000  |
| O | 4.874268  | 0.810322  | 0.000000  |
| H | 1.922119  | -2.555078 | 0.000004  |
| C | 4.568326  | -1.982121 | -0.000003 |
| H | 5.202163  | -1.809904 | -0.872027 |
| H | 5.202168  | -1.809901 | 0.872017  |
| H | 4.236187  | -3.020754 | 0.000000  |
| C | 2.831120  | 2.741734  | -0.000001 |
| H | 1.903939  | 3.314686  | 0.000003  |
| H | 3.425260  | 3.022297  | 0.872172  |
| H | 3.425252  | 3.022297  | -0.872179 |
| H | 0.436222  | 1.472297  | 0.000005  |

E-35Me<sup>-</sup> – S<sub>0</sub>

|   |           |           |           |
|---|-----------|-----------|-----------|
| C | 2.129678  | 0.715986  | -0.000004 |
| C | 3.776553  | -0.829630 | 0.000000  |
| C | 1.618434  | -0.638912 | -0.000002 |
| C | 5.166181  | -1.360400 | 0.000003  |
| H | 5.722373  | -1.028856 | 0.880692  |
| H | 5.122178  | -2.446476 | 0.000004  |
| H | 5.722376  | -1.028858 | -0.880684 |
| C | 4.464406  | 1.603626  | 0.000002  |
| H | 5.100961  | 1.581587  | -0.887739 |
| H | 3.888412  | 2.527792  | 0.000001  |
| H | 5.100957  | 1.581587  | 0.887746  |
| N | 2.703836  | -1.538276 | -0.000001 |
| N | 3.519333  | 0.525787  | 0.000000  |
| C | 0.334514  | -1.156405 | -0.000001 |
| H | 0.359724  | -2.243807 | 0.000000  |
| C | -0.957533 | -0.619452 | -0.000001 |
| C | -1.282474 | 0.767694  | 0.000000  |
| C | -2.052711 | -1.532498 | -0.000001 |
| C | -2.569025 | 1.210446  | 0.000000  |
| C | -3.352841 | -1.138569 | -0.000001 |
| C | -3.686093 | 0.277934  | -0.000002 |
| O | 1.616842  | 1.834073  | -0.000003 |
| O | -4.869593 | 0.667845  | 0.000004  |
| H | -1.824934 | -2.595697 | 0.000000  |
| C | -4.493165 | -2.110615 | 0.000000  |
| H | -5.133561 | -1.960037 | 0.872100  |
| H | -5.133562 | -1.960038 | -0.872100 |
| H | -4.132310 | -3.140676 | 0.000001  |
| C | -2.904407 | 2.671583  | 0.000001  |
| H | -1.998625 | 3.278180  | 0.000002  |
| H | -3.508587 | 2.932118  | -0.872198 |
| H | -3.508587 | 2.932116  | 0.872202  |
| H | -0.466091 | 1.478416  | 0.000001  |

Z-35Bu<sup>-</sup> – S<sub>0</sub>

|   |           |           |           |
|---|-----------|-----------|-----------|
| C | -3.797305 | -1.531565 | -0.000002 |
| C | -4.224008 | 0.681027  | 0.000001  |
| C | -2.591575 | -0.724038 | -0.000002 |
| C | -5.038306 | 1.925111  | 0.000003  |
| H | -5.682844 | 1.979135  | 0.880753  |
| H | -4.366590 | 2.779260  | 0.000005  |
| H | -5.682843 | 1.979140  | -0.880748 |
| C | -6.214059 | -0.883602 | 0.000004  |
| H | -6.715950 | -0.491889 | -0.887630 |
| H | -6.291953 | -1.969912 | -0.000009 |
| H | -6.715942 | -0.491910 | 0.887652  |
| N | -2.937914 | 0.635331  | -0.000001 |
| N | -4.815529 | -0.567523 | 0.000000  |
| C | -1.332684 | -1.271447 | -0.000003 |
| H | -1.352699 | -2.358675 | -0.000003 |
| C | -0.053610 | -0.687002 | -0.000002 |
| C | 0.175658  | 0.710356  | -0.000003 |
| C | 1.083259  | -1.529519 | 0.000000  |
| C | 1.426255  | 1.253470  | -0.000002 |
| C | 2.365958  | -1.065077 | 0.000002  |
| C | 2.601373  | 0.378785  | 0.000001  |
| O | -4.002177 | -2.740974 | -0.000003 |
| O | 3.761192  | 0.847600  | 0.000001  |
| H | 0.893538  | -2.595807 | 0.000000  |
| C | 3.569126  | -2.013134 | 0.000001  |
| C | 1.632868  | 2.771549  | -0.000001 |
| H | -0.699866 | 1.340100  | -0.000005 |
| C | 3.147999  | -3.486173 | 0.000000  |
| H | 2.562025  | -3.742009 | 0.884781  |
| H | 2.562028  | -3.742010 | -0.884782 |
| H | 4.041629  | -4.114442 | 0.000002  |
| C | 4.424921  | -1.779313 | -1.256702 |
| H | 4.773540  | -0.750468 | -1.293010 |
| H | 5.289566  | -2.450088 | -1.254597 |
| H | 3.838737  | -1.983280 | -2.155481 |
| C | 4.424924  | -1.779316 | 1.256703  |
| H | 5.289565  | -2.450096 | 1.254596  |
| H | 4.773547  | -0.750473 | 1.293010  |
| H | 3.838741  | -1.983281 | 2.155483  |
| C | 0.303813  | 3.534110  | -0.000007 |
| H | -0.296394 | 3.305875  | 0.882272  |
| H | 0.507583  | 4.607639  | -0.000007 |
| H | -0.296386 | 3.305873  | -0.882290 |
| C | 2.410658  | 3.198356  | 1.256611  |
| H | 2.560703  | 4.282347  | 1.256175  |
| H | 1.848950  | 2.933866  | 2.155207  |
| H | 3.378992  | 2.705788  | 1.291470  |
| C | 2.410670  | 3.198361  | -1.256603 |
| H | 3.379009  | 2.705799  | -1.291449 |
| H | 1.848976  | 2.933866  | -2.155206 |
| H | 2.560708  | 4.282353  | -1.256166 |

Z-35Bu<sup>-</sup> – D<sub>0</sub>

|   |           |           |           |
|---|-----------|-----------|-----------|
| C | -3.786115 | -1.558061 | 0.000004  |
| C | -4.189446 | 0.642131  | -0.000008 |
| C | -2.548336 | -0.739154 | -0.000004 |
| C | -4.989311 | 1.889572  | -0.000014 |
| H | -5.633214 | 1.934780  | 0.879806  |
| H | -4.318767 | 2.743063  | -0.000021 |
| H | -5.633219 | 1.934769  | -0.879832 |
| C | -6.203173 | -0.890857 | 0.000010  |
| H | -6.689038 | -0.488895 | -0.888654 |
| H | -6.303560 | -1.973751 | 0.000013  |
| H | -6.689028 | -0.488892 | 0.888678  |
| N | -2.891543 | 0.600571  | -0.000012 |
| N | -4.792239 | -0.593037 | 0.000002  |
| C | -1.307602 | -1.314366 | -0.000002 |
| H | -1.328443 | -2.398980 | 0.000002  |
| C | -0.032293 | -0.703463 | -0.000003 |
| C | 0.151420  | 0.707175  | -0.000003 |
| C | 1.111725  | -1.549288 | -0.000003 |
| C | 1.381991  | 1.276431  | 0.000001  |
| C | 2.381082  | -1.072449 | 0.000000  |
| C | 2.575383  | 0.397268  | 0.000005  |
| O | -3.952527 | -2.755397 | 0.000014  |
| O | 3.707461  | 0.877036  | 0.000005  |
| H | 0.929198  | -2.614447 | -0.000005 |
| C | 3.599392  | -1.991720 | -0.000002 |
| C | 1.566903  | 2.791671  | 0.000004  |
| H | -0.739400 | 1.312229  | -0.000003 |
| C | 3.193642  | -3.468965 | -0.000006 |
| H | 2.615396  | -3.735020 | 0.886253  |
| H | 2.615394  | -3.735015 | -0.886265 |
| H | 4.094259  | -4.083163 | -0.000008 |
| C | 4.445654  | -1.740589 | -1.260862 |
| H | 4.824143  | -0.723158 | -1.289087 |
| H | 5.293816  | -2.427473 | -1.271741 |
| H | 3.855734  | -1.920927 | -2.161272 |
| C | 4.445654  | -1.740594 | 1.260858  |
| H | 5.293818  | -2.427476 | 1.271731  |
| H | 4.824141  | -0.723163 | 1.289089  |
| H | 3.855736  | -1.920940 | 2.161268  |
| C | 0.220026  | 3.522375  | 0.000002  |
| H | -0.373430 | 3.285831  | 0.884313  |
| H | 0.401584  | 4.597532  | 0.000003  |
| H | -0.373428 | 3.285833  | -0.884311 |
| C | 2.334815  | 3.227168  | 1.260721  |
| H | 2.426945  | 4.314749  | 1.272422  |
| H | 1.796029  | 2.926015  | 2.160884  |
| H | 3.330979  | 2.795584  | 1.288811  |
| C | 2.334820  | 3.227170  | -1.260710 |
| H | 3.330977  | 2.795571  | -1.288806 |
| H | 1.796028  | 2.926035  | -2.160875 |
| H | 2.426967  | 4.314750  | -1.272399 |

Z-35Bu<sup>-</sup> – triplet

|   |           |           |           |
|---|-----------|-----------|-----------|
| C | -3.812787 | -1.557181 | 0.000001  |
| C | -4.200342 | 0.646362  | -0.000001 |
| C | -2.575143 | -0.782005 | 0.000002  |
| C | -4.952306 | 1.924667  | -0.000004 |
| H | -5.594630 | 2.017098  | 0.880764  |
| H | -4.238925 | 2.744804  | -0.000002 |
| H | -5.594625 | 2.017097  | -0.880776 |
| C | -6.216558 | -0.857323 | -0.000002 |
| H | -6.707391 | -0.452626 | -0.887654 |
| H | -6.319713 | -1.941339 | -0.000006 |
| H | -6.707390 | -0.452633 | 0.887654  |
| N | -2.882777 | 0.547546  | 0.000000  |
| N | -4.811349 | -0.570965 | -0.000001 |
| C | -1.299462 | -1.389967 | 0.000003  |
| H | -1.320067 | -2.472124 | 0.000004  |
| C | -0.040091 | -0.757966 | 0.000002  |
| C | 0.148908  | 0.652290  | 0.000002  |
| C | 1.141064  | -1.558081 | 0.000002  |
| C | 1.386798  | 1.235475  | 0.000000  |
| C | 2.402633  | -1.041174 | -0.000001 |
| C | 2.587054  | 0.410228  | -0.000005 |
| O | -4.035528 | -2.769474 | 0.000002  |
| O | 3.740512  | 0.920280  | -0.000004 |
| H | 0.990813  | -2.628901 | 0.000004  |
| C | 3.637279  | -1.946911 | -0.000001 |
| C | 1.532108  | 2.760368  | 0.000001  |
| H | -0.743434 | 1.253494  | 0.000004  |
| C | 3.270698  | -3.434611 | -0.000002 |
| H | 2.694795  | -3.711834 | 0.884365  |
| H | 2.694798  | -3.711833 | -0.884372 |
| H | 4.187986  | -4.027606 | -0.000001 |
| C | 4.481867  | -1.680101 | -1.257901 |
| H | 4.806732  | -0.643577 | -1.287139 |
| H | 5.360643  | -2.331668 | -1.262751 |
| H | 3.898206  | -1.890886 | -2.156553 |
| C | 4.481866  | -1.680104 | 1.257900  |
| H | 5.360641  | -2.331672 | 1.262751  |
| H | 4.806733  | -0.643580 | 1.287141  |
| H | 3.898204  | -1.890889 | 2.156551  |
| C | 0.174598  | 3.471888  | 0.000004  |
| H | -0.416482 | 3.220731  | 0.881714  |
| H | 0.339200  | 4.552091  | 0.000008  |
| H | -0.416482 | 3.220737  | -0.881707 |
| C | 2.292646  | 3.214897  | 1.257661  |
| H | 2.386991  | 4.304897  | 1.263403  |
| H | 1.747579  | 2.917226  | 2.155940  |
| H | 3.284719  | 2.772217  | 1.287685  |
| C | 2.292642  | 3.214899  | -1.257660 |
| H | 3.284715  | 2.772218  | -1.287689 |
| H | 1.747572  | 2.917231  | -2.155938 |
| H | 2.386988  | 4.304900  | -1.263400 |

E-35Bu<sup>-</sup> – S<sub>0</sub>

|   |           |           |           |
|---|-----------|-----------|-----------|
| C | -3.232192 | 0.414479  | -0.000002 |
| C | -4.781128 | -1.227804 | 0.000001  |
| C | -2.638585 | -0.908856 | 0.000001  |
| C | -6.136745 | -1.839849 | 0.000003  |
| H | -6.710812 | -1.540952 | -0.880673 |
| H | -6.029074 | -2.921361 | 0.000004  |
| H | -6.710811 | -1.540950 | 0.880679  |
| C | -5.614370 | 1.161141  | -0.000003 |
| H | -6.247981 | 1.100771  | 0.887806  |
| H | -5.094387 | 2.117921  | 0.000000  |
| H | -6.247975 | 1.100774  | -0.887817 |
| N | -3.668885 | -1.871624 | 0.000002  |
| N | -4.606281 | 0.141297  | -0.000001 |
| C | -1.328332 | -1.345199 | 0.000001  |
| H | -1.285457 | -2.431984 | 0.000002  |
| C | -0.069038 | -0.727084 | 0.000000  |
| C | 0.161892  | 0.672596  | 0.000000  |
| C | 1.073644  | -1.569399 | 0.000000  |
| C | 1.413814  | 1.212521  | 0.000001  |
| C | 2.354295  | -1.107275 | 0.000000  |
| C | 2.589246  | 0.338586  | 0.000003  |
| O | -2.785919 | 1.559577  | -0.000004 |
| O | 3.748986  | 0.803580  | 0.000001  |
| H | 0.885318  | -2.635874 | -0.000001 |
| C | 3.557219  | -2.055480 | -0.000001 |
| C | 1.621100  | 2.730965  | 0.000001  |
| H | -0.711780 | 1.305931  | 0.000000  |
| C | 3.135975  | -3.528548 | 0.000000  |
| H | 2.550066  | -3.784238 | 0.884921  |
| H | 2.550064  | -3.784238 | -0.884921 |
| H | 4.029622  | -4.156785 | -0.000002 |
| C | 4.412925  | -1.821863 | -1.256788 |
| H | 4.762642  | -0.793440 | -1.292731 |
| H | 5.276819  | -2.493588 | -1.255099 |
| H | 3.826395  | -2.024600 | -2.155615 |
| C | 4.412926  | -1.821862 | 1.256785  |
| H | 5.276822  | -2.493584 | 1.255095  |
| H | 4.762639  | -0.793437 | 1.292729  |
| H | 3.826397  | -2.024601 | 2.155613  |
| C | 0.291553  | 3.491803  | 0.000003  |
| H | -0.311913 | 3.262785  | 0.878961  |
| H | 0.495460  | 4.565505  | 0.000001  |
| H | -0.311918 | 3.262783  | -0.878951 |
| C | 2.399250  | 3.157576  | 1.256603  |
| H | 2.545111  | 4.242093  | 1.256838  |
| H | 1.837759  | 2.891562  | 2.154852  |
| H | 3.369806  | 2.669379  | 1.292481  |
| C | 2.399246  | 3.157575  | -1.256604 |
| H | 3.369801  | 2.669375  | -1.292488 |
| H | 1.837750  | 2.891564  | -2.154851 |
| H | 2.545110  | 4.242092  | -1.256838 |

pHBDI<sup>-</sup> P-twisted minimum (TD-CAM-B3LYP/6-311G(d,p))

|   |           |           |           |
|---|-----------|-----------|-----------|
| C | 3.436305  | -0.265705 | 1.021087  |
| C | 2.200924  | -0.782109 | 0.784572  |
| C | 1.489307  | -0.533339 | -0.42077  |
| C | 2.119514  | 0.313963  | -1.37274  |
| C | 3.353573  | 0.847291  | -1.169258 |
| C | 4.100735  | 0.584488  | 0.048483  |
| H | 3.977733  | -0.46222  | 1.939066  |
| H | 1.718685  | -1.41024  | 1.522939  |
| H | 1.574918  | 0.524171  | -2.284609 |
| H | 3.832562  | 1.488583  | -1.899843 |
| C | 0.177872  | -1.139732 | -0.67955  |
| C | -2.422803 | 0.924175  | 0.465959  |
| C | -1.025742 | -0.53097  | -0.325183 |
| N | -1.147934 | 0.701838  | 0.305552  |
| C | -2.331772 | -1.090176 | -0.560319 |
| O | -2.732204 | -2.143859 | -1.080642 |
| N | -3.193986 | -0.105538 | -0.027822 |
| C | -4.620296 | -0.24117  | -0.045183 |
| H | -4.822165 | -1.201196 | -0.523863 |
| H | -5.049002 | -0.248217 | 0.963131  |
| H | -5.106076 | 0.553887  | -0.621804 |
| C | -3.008081 | 2.13416   | 1.102523  |
| H | -3.663059 | 2.691823  | 0.421223  |
| H | -3.603123 | 1.89403   | 1.9927    |
| H | -2.187313 | 2.784432  | 1.40136   |
| O | 5.231114  | 1.055347  | 0.245106  |
| H | 0.132763  | -2.103869 | -1.167832 |

Initial conditions for the  $p\text{HBDI}^-$  trajectory, a.u.

| Initial geometry |            |            |            | Initial velocity |             |             |
|------------------|------------|------------|------------|------------------|-------------|-------------|
|                  |            |            |            | 0.00051765       | 0.0005276   | -0.00020267 |
| C                | -6.8554552 | 3.36651531 | -0.0558245 | -0.00083514      | -0.0005174  | -0.00001454 |
| C                | -4.1850885 | 3.59913739 | 0.0938121  | -0.00029271      | 0.00010162  | 0.00003761  |
| C                | -2.547782  | 1.59201731 | -0.065468  | 0.00031653       | -0.00010989 | -0.00011721 |
| C                | -3.6248638 | -0.871747  | -0.0897068 | -0.00064499      | -0.00035548 | 0.00004872  |
| C                | -6.268443  | -1.2571249 | 0.0660379  | -0.00020974      | -0.0000025  | 0.00030013  |
| C                | -8.0229158 | 0.96776151 | 0.02409941 | 0.00002409       | -0.00201294 | -0.0001449  |
| H                | -7.9434199 | 5.08359109 | 0.37760848 | -0.00116742      | -0.00201812 | 0.00049628  |
| H                | -3.4656414 | 5.66205992 | 0.4745052  | -0.00091149      | 0.001294    | 0.00070374  |
| H                | -2.8004976 | -2.6921306 | -0.2290899 | 0.00251576       | 0.00071225  | 0.00079556  |
| H                | -6.8709253 | -2.9045082 | 0.00455078 | 0.00035643       | 0.00059607  | -0.00008579 |
| C                | -0.0470404 | 2.02109217 | -0.1325689 | 0.00014629       | -0.0000004  | 0.0000273   |
| C                | 4.28318783 | -2.953226  | -0.0222483 | 0.00039408       | -0.00019282 | -0.00011987 |
| C                | 2.06071959 | 0.43294397 | -0.0154507 | -0.00025945      | 0.00038031  | -0.00001446 |
| N                | 1.93601987 | -2.2887124 | -0.0394873 | -0.00091889      | -0.00038379 | 0.00029576  |
| C                | 4.51839212 | 1.21386888 | -0.0443391 | 0.00031863       | 0.00023935  | -0.00018191 |
| O                | 5.66562324 | 3.30061268 | 0.08553106 | -0.00017424      | -0.00022793 | 0.00019037  |
| N                | 6.10481783 | -1.0777859 | 0.00083484 | 0.00037398       | -0.00003524 | 0.00021632  |
| C                | 8.78016351 | -1.046758  | 0.02453483 | 0.00152554       | 0.00215593  | -0.00075256 |
| H                | 9.20527452 | 1.02008525 | -0.0222824 | -0.00050081      | -0.0006291  | -0.00137037 |
| H                | 9.60114732 | -1.8666526 | 1.80458411 | 0.00254171       | -0.00092875 | -0.00058964 |
| H                | 9.29453925 | -2.1455741 | -1.7634763 | 0.00014162       | -0.00015791 | -0.0004474  |
| C                | 4.88620855 | -5.9008204 | 0.04520826 | 0.00101217       | 0.00076869  | 0.00364464  |
| H                | 6.52299611 | -6.3253257 | -1.57246   | -0.0007202       | 0.00111514  | -0.00311959 |
| H                | 6.44670215 | -5.9163051 | 1.50729139 | -0.00066943      | 0.00029492  | 0.00162438  |
| H                | 3.18013139 | -6.9755803 | 0.52403356 | 0.00029975       | 0.00022042  | -0.00010564 |
| O                | -10.415903 | 0.46860554 | 0.02329024 | 0.00020494       | -0.00508433 | 0.0010969   |
| H                | 0.58000516 | 3.63224764 | -0.2325662 |                  |             |             |

## Structures for SOC calculations, Å

$t = 1390$  fs

|   |           |           |           |
|---|-----------|-----------|-----------|
| C | 3.115724  | 0.468279  | 1.18341   |
| C | 2.112601  | -0.253262 | 0.78772   |
| C | 1.455784  | -0.402556 | -0.5587   |
| C | 2.342547  | -0.318223 | -1.629595 |
| C | 3.541079  | 0.32326   | -1.255954 |
| C | 3.992416  | 0.748413  | 0.030915  |
| H | 3.677352  | 0.669151  | 1.926719  |
| H | 1.47288   | -0.495448 | 1.548568  |
| H | 2.253875  | -0.794064 | -2.614613 |
| H | 4.461278  | 0.377288  | -1.893531 |
| C | 0.149873  | -0.958298 | -0.750652 |
| C | -2.59965  | 0.98051   | 0.45464   |
| C | -1.077805 | -0.191778 | -0.640095 |
| N | -1.304081 | 0.930812  | 0.153907  |
| C | -2.405798 | -0.662336 | -0.959053 |
| O | -2.758971 | -1.474313 | -1.978172 |
| N | -3.270034 | -0.032135 | -0.150278 |
| C | -4.69165  | -0.276359 | -0.055557 |
| H | -5.177759 | 0.70049   | 0.067627  |
| H | -4.897791 | -0.706626 | -0.935534 |
| H | -4.859672 | -0.871528 | 0.796865  |
| C | -3.035714 | 1.763745  | 1.585514  |
| H | -3.628967 | 2.598238  | 1.1313    |
| H | -3.567809 | 1.09802   | 2.285941  |
| H | -2.002454 | 2.093455  | 1.972987  |
| O | 5.155236  | 0.979208  | 0.155645  |
| H | -0.020041 | -2.054094 | -0.625742 |

$t = 1440$  fs

|   |           |           |           |
|---|-----------|-----------|-----------|
| C | 3.087084  | 0.463904  | 0.994472  |
| C | 1.966888  | -0.074006 | 0.766416  |
| C | 1.381394  | -0.44138  | -0.478449 |
| C | 2.265148  | -0.335125 | -1.519759 |
| C | 3.642204  | -0.021296 | -1.213922 |
| C | 4.085929  | 0.546096  | 0.001551  |
| H | 3.538107  | 0.838565  | 2.104273  |
| H | 1.4992    | -0.260186 | 1.731399  |
| H | 2.229653  | -0.538689 | -2.542839 |
| H | 4.391578  | -0.228045 | -1.926226 |
| C | -0.010934 | -0.94179  | -0.979529 |
| C | -2.43789  | 0.931049  | 0.539492  |
| C | -1.148561 | -0.250081 | -0.631037 |
| N | -1.208657 | 0.721819  | 0.373957  |
| C | -2.417937 | -0.370427 | -1.236465 |
| O | -2.895264 | -1.095178 | -2.063466 |
| N | -3.284186 | 0.413188  | -0.406265 |
| C | -4.431943 | -0.356856 | 0.104705  |
| H | -5.226361 | 0.326182  | 0.33191   |
| H | -4.654946 | -0.888992 | -0.947717 |
| H | -3.86273  | -0.989851 | 0.855691  |
| C | -3.089355 | 1.850912  | 1.600836  |
| H | -4.119704 | 2.050371  | 1.23962   |
| H | -3.327759 | 1.104508  | 2.397224  |
| H | -2.415968 | 2.629193  | 1.820069  |
| O | 5.124768  | 1.117898  | 0.291282  |
| H | -0.247308 | -1.961936 | -1.172938 |



$t = 1690$  fs

|   |           |           |           |
|---|-----------|-----------|-----------|
| C | 3.717005  | -0.452093 | 0.843979  |
| C | 2.556715  | -1.102217 | 0.868232  |
| C | 1.447838  | -0.725365 | -0.143125 |
| C | 1.881746  | 0.316248  | -0.892206 |
| C | 3.017762  | 1.067546  | -0.738858 |
| C | 4.147405  | 0.712951  | 0.0544    |
| H | 4.554948  | -0.777175 | 1.783617  |
| H | 2.326791  | -1.803908 | 1.482295  |
| H | 1.148789  | 0.51992   | -1.599339 |
| H | 3.075914  | 1.750996  | -1.555503 |
| C | 0.166198  | -1.320032 | -0.526344 |
| C | -2.500576 | 0.939078  | 0.364728  |
| C | -0.976705 | -0.63448  | -0.145935 |
| N | -1.181259 | 0.745813  | 0.213848  |
| C | -2.216843 | -1.275026 | -0.422306 |
| O | -2.519863 | -2.289607 | -0.884324 |
| N | -3.176916 | -0.224522 | 0.062149  |
| C | -4.612568 | -0.219366 | -0.048557 |
| H | -4.82573  | 0.270284  | -0.940646 |
| H | -5.173289 | -1.186355 | -0.0971   |
| H | -4.986949 | 0.271176  | 0.743302  |
| C | -3.132141 | 2.356356  | 0.72227   |
| H | -3.998833 | 2.787904  | 0.112957  |
| H | -3.28058  | 2.415289  | 1.805512  |
| H | -2.324314 | 2.998427  | 0.704175  |
| O | 5.294248  | 1.080647  | -0.235179 |
| H | 0.003657  | -1.982639 | -1.49776  |

$t = 1990$  fs

|   |           |           |           |
|---|-----------|-----------|-----------|
| C | 3.122394  | -0.044075 | 1.119944  |
| C | 1.960699  | -0.484014 | 0.838533  |
| C | 1.422361  | -0.468943 | -0.474244 |
| C | 2.306827  | 0.21405   | -1.384038 |
| C | 3.530544  | 0.657005  | -1.208393 |
| C | 4.209812  | 0.403569  | 0.095296  |
| H | 3.479113  | -0.377672 | 2.112479  |
| H | 1.692965  | -1.415371 | 1.327869  |
| H | 1.814694  | 0.575175  | -2.248713 |
| H | 4.057743  | 1.009996  | -2.038955 |
| C | -0.010716 | -0.939723 | -0.904817 |
| C | -2.527572 | 0.983917  | 0.564965  |
| C | -1.105651 | -0.104021 | -0.687843 |
| N | -1.239353 | 0.893994  | 0.288794  |
| C | -2.398212 | -0.610019 | -1.025577 |
| O | -2.616723 | -1.451744 | -1.891184 |
| N | -3.294793 | -0.246649 | 0.014644  |
| C | -4.695771 | -0.695415 | 0.22478   |
| H | -4.699219 | -1.43146  | 1.113692  |
| H | -5.391713 | 0.199599  | 0.288005  |
| H | -4.787468 | -1.271717 | -0.625987 |
| C | -2.859807 | 2.165105  | 1.177852  |
| H | -2.258439 | 2.352558  | 2.229973  |
| H | -2.554915 | 3.104053  | 0.607478  |
| H | -4.028787 | 2.199056  | 1.34729   |
| O | 5.354759  | 0.922926  | 0.414763  |
| H | -0.050323 | -1.900332 | -1.242324 |

$t = 2450$  fs

|   |           |           |           |
|---|-----------|-----------|-----------|
| C | 3.112744  | 0.249467  | 1.092242  |
| C | 1.935951  | -0.326232 | 0.62384   |
| C | 1.423214  | -0.49516  | -0.717381 |
| C | 2.346216  | 0.104534  | -1.647381 |
| C | 3.576695  | 0.528147  | -1.12724  |
| C | 4.122824  | 0.695303  | 0.265244  |
| H | 3.221982  | 0.110597  | 2.110055  |
| H | 1.16968   | -0.429338 | 1.341509  |
| H | 2.563667  | -0.050589 | -2.703145 |
| H | 4.363766  | 0.474048  | -1.863436 |
| C | 0.096127  | -1.114418 | -0.967465 |
| C | -2.453951 | 1.047617  | 0.319676  |
| C | -1.060943 | -0.442188 | -0.656714 |
| N | -1.163677 | 0.854609  | 0.101316  |
| C | -2.425912 | -0.928158 | -0.854012 |
| O | -3.011003 | -1.997098 | -1.086071 |
| N | -3.262117 | 0.12934   | -0.264894 |
| C | -4.704584 | -0.381747 | 0.107676  |
| H | -5.000234 | -0.820600 | -0.964944 |
| H | -4.949712 | -1.25543  | 0.684129  |
| H | -5.417904 | 0.379064  | 0.307653  |
| C | -2.727027 | 2.051311  | 1.339292  |
| H | -3.826833 | 2.501462  | 1.339072  |
| H | -2.645226 | 1.48243   | 2.452049  |
| H | -2.119621 | 2.944646  | 1.258682  |
| O | 5.221636  | 1.146232  | 0.573377  |
| H | 0.046692  | -2.21800  | -1.028842 |

$t = 2540$  fs

|   |           |           |           |
|---|-----------|-----------|-----------|
| C | 3.245098  | -0.160918 | 1.09062   |
| C | 2.059482  | -0.623041 | 0.882423  |
| C | 1.585034  | -0.604196 | -0.573639 |
| C | 2.342347  | 0.206156  | -1.423657 |
| C | 3.533826  | 0.804613  | -1.146932 |
| C | 4.207103  | 0.437165  | 0.074683  |
| H | 3.635425  | 0.050998  | 2.105748  |
| H | 1.340654  | -0.989466 | 1.653199  |
| H | 1.91667   | 0.191718  | -2.390623 |
| H | 4.075486  | 1.165073  | -2.147683 |
| C | 0.283583  | -1.039568 | -0.936537 |
| C | -2.344617 | 0.912424  | 0.672854  |
| C | -1.01592  | -0.44907  | -0.597878 |
| N | -1.144687 | 0.906979  | 0.061636  |
| C | -2.377756 | -0.98421  | -0.730577 |
| O | -2.684433 | -1.705587 | -1.636188 |
| N | -3.122503 | -0.389476 | 0.33917   |
| C | -4.581848 | -0.253337 | 0.202314  |
| H | -4.563297 | -0.315245 | -0.883447 |
| H | -5.17193  | -1.106998 | 0.636123  |
| H | -4.95446  | 0.64156   | 0.833409  |
| C | -3.164318 | 1.979621  | 1.077967  |
| H | -3.494636 | 1.930816  | 2.147021  |
| H | -2.705864 | 3.084262  | 1.120533  |
| H | -4.135139 | 2.124442  | 0.405043  |
| O | 5.372254  | 0.600459  | 0.307294  |
| H | 0.296893  | -2.175326 | -1.108593 |

$t = 2620$  fs

|   |           |           |           |
|---|-----------|-----------|-----------|
| C | 3.616097  | -0.628334 | 0.88801   |
| C | 2.286228  | -0.685214 | 1.00389   |
| C | 1.5111    | -0.381364 | -0.187884 |
| C | 2.105444  | 0.518483  | -1.102438 |
| C | 3.393183  | 0.857687  | -1.103236 |
| C | 4.234331  | 0.277378  | -0.038706 |
| H | 4.327105  | -1.228791 | 1.466046  |
| H | 1.962357  | -0.981977 | 1.999675  |
| H | 1.379751  | 0.861801  | -1.889761 |
| H | 3.828672  | 1.514088  | -1.697609 |
| C | 0.246052  | -0.845297 | -0.689888 |
| C | -2.647856 | 0.896026  | 0.166988  |
| C | -1.020204 | -0.450512 | -0.456514 |
| N | -1.381622 | 0.734486  | 0.284037  |
| C | -2.283239 | -1.105217 | -0.77227  |
| O | -2.55692  | -2.266667 | -0.828483 |
| N | -3.327767 | -0.073044 | -0.507548 |
| C | -4.684427 | -0.299955 | 0.070759  |
| H | -5.662173 | 0.048216  | -0.197791 |
| H | -4.739558 | -1.367815 | -0.014553 |
| H | -4.751837 | -0.049233 | 1.080089  |
| C | -3.141613 | 2.179694  | 0.780619  |
| H | -3.241257 | 2.242296  | 1.861256  |
| H | -2.425566 | 2.810344  | 0.506889  |
| H | -4.202946 | 2.7045    | 0.273788  |
| O | 5.286989  | 0.746297  | 0.270214  |
| H | 0.322126  | -1.788028 | -1.131296 |

$t = 2660$  fs

|   |           |           |           |
|---|-----------|-----------|-----------|
| C | 3.540043  | -0.466327 | 0.97205   |
| C | 2.311815  | -0.947214 | 0.506262  |
| C | 1.452536  | -0.416189 | -0.502634 |
| C | 2.124196  | 0.675825  | -1.16801  |
| C | 3.430296  | 0.870246  | -0.997024 |
| C | 4.277778  | 0.381095  | 0.079905  |
| H | 4.093174  | -1.165003 | 1.620727  |
| H | 1.897166  | -1.777567 | 0.931656  |
| H | 1.57949   | 1.271336  | -1.937131 |
| H | 3.96600   | 1.60606   | -1.593546 |
| C | 0.122579  | -1.039971 | -0.542382 |
| C | -2.408201 | 1.098563  | 0.442326  |
| C | -0.855519 | -0.466618 | 0.248484  |
| N | -1.156772 | 0.912667  | 0.48638   |
| C | -2.080506 | -1.168108 | 0.087304  |
| O | -2.445485 | -2.159171 | -0.505558 |
| N | -3.119696 | -0.00183  | 0.126494  |
| C | -4.552539 | -0.223974 | 0.00719   |
| H | -5.136814 | 0.606677  | -0.504576 |
| H | -4.693054 | -1.149595 | -0.754382 |
| H | -5.003538 | -0.70495  | 1.076226  |
| C | -3.384726 | 2.219383  | 0.762338  |
| H | -4.307781 | 1.986655  | 1.328057  |
| H | -2.827396 | 3.222147  | 0.945418  |
| H | -3.827333 | 2.501657  | -0.144958 |
| O | 5.442871  | 0.557426  | 0.086705  |
| H | -0.006135 | -1.983372 | -1.023039 |

$t = 3200$  fs

|   |           |           |           |
|---|-----------|-----------|-----------|
| C | 3.607542  | -0.251362 | 1.044998  |
| C | 2.386489  | -0.925931 | 0.835893  |
| C | 1.443218  | -0.571581 | -0.19671  |
| C | 1.814873  | 0.375036  | -1.136379 |
| C | 2.961131  | 1.105435  | -1.14655  |
| C | 4.0514    | 0.628826  | 0.022593  |
| H | 4.402631  | -0.56517  | 1.831277  |
| H | 2.050925  | -1.723332 | 1.59812   |
| H | 1.057486  | 0.68784   | -1.945505 |
| H | 3.373364  | 1.578149  | -2.078745 |
| C | 0.183866  | -1.407065 | -0.484884 |
| C | -2.220167 | 1.003168  | 0.440591  |
| C | -1.002517 | -0.738821 | -0.037198 |
| N | -1.028824 | 0.594744  | 0.296315  |
| C | -2.377237 | -1.190733 | -0.249879 |
| O | -2.905317 | -2.279666 | -0.429431 |
| N | -3.123493 | -0.073603 | -0.094943 |
| C | -4.490284 | -0.110777 | -0.253812 |
| H | -4.909606 | 0.936051  | -0.731915 |
| H | -5.041189 | -0.803881 | -0.952959 |
| H | -4.905504 | -0.383394 | 0.69424   |
| C | -2.880163 | 2.090901  | 0.991691  |
| H | -3.223983 | 2.677057  | 0.16158   |
| H | -3.709992 | 1.65621   | 1.522251  |
| H | -2.138738 | 2.816606  | 1.442736  |
| O | 5.02464   | 1.29169   | 0.096527  |
| H | 0.031897  | -2.176546 | -1.205621 |

$t = 3230$  fs

|   |           |           |           |
|---|-----------|-----------|-----------|
| C | 3.368828  | -0.293185 | 0.969912  |
| C | 2.163707  | -0.759479 | 0.60059   |
| C | 1.508759  | -0.580391 | -0.531714 |
| C | 2.179191  | 0.349165  | -1.396533 |
| C | 3.215817  | 1.206121  | -1.040937 |
| C | 4.114682  | 0.645551  | 0.129474  |
| H | 4.082968  | -0.711804 | 1.673227  |
| H | 1.762641  | -1.515406 | 1.297857  |
| H | 1.387979  | 0.618592  | -2.246296 |
| H | 3.297774  | 1.819824  | -1.896898 |
| C | 0.285261  | -1.320215 | -0.499899 |
| C | -2.356486 | 0.905594  | 0.469954  |
| C | -0.951666 | -0.817578 | -0.017922 |
| N | -1.181112 | 0.394187  | 0.622848  |
| C | -2.420909 | -1.332361 | -0.270031 |
| O | -2.775102 | -2.474092 | -0.662673 |
| N | -3.115605 | -0.099087 | -0.104813 |
| C | -4.547461 | -0.072267 | -0.168476 |
| H | -5.019697 | 0.563134  | -0.826496 |
| H | -5.137668 | -1.063809 | -0.294479 |
| H | -4.941038 | 0.348417  | 0.824083  |
| C | -2.904866 | 2.173617  | 0.986685  |
| H | -3.425259 | 2.678757  | 0.10940   |
| H | -3.695189 | 1.794149  | 1.626691  |
| H | -2.063833 | 2.98235   | 1.061427  |
| O | 5.277956  | 1.159746  | 0.368021  |
| H | 0.32278   | -2.359679 | -0.74872  |

### Optimised microsolvated structures (MP2/aug-cc-pVDZ), Å

Five explicit water molecules and SMD implicit solvation:

s1: five waters around phenoxide

s2: three waters around phenoxide and two around imidazolium  
none

Structures shown in Fig. S3.

Z-pHBDI<sup>-</sup> – s1

|   |           |           |           |
|---|-----------|-----------|-----------|
| C | 2.225648  | -0.210486 | -0.01064  |
| C | 1.767766  | -1.559203 | -0.034138 |
| C | 0.399735  | -1.852744 | -0.034982 |
| C | -0.578464 | -0.819654 | -0.013383 |
| C | -0.126507 | 0.529852  | 0.00854   |
| C | 1.241362  | 0.822381  | 0.009886  |
| H | 0.067808  | -2.897025 | -0.052352 |
| H | -0.855699 | 1.342029  | 0.024243  |
| C | -1.974291 | -1.211267 | -0.014449 |
| H | -2.167214 | -2.292592 | -0.0229   |
| O | 3.532529  | 0.08091   | -0.007306 |
| C | -3.109856 | -0.436191 | -0.007689 |
| C | -4.468158 | -1.035088 | -0.010705 |
| C | -4.510094 | 1.220172  | -0.001919 |
| N | -3.211528 | 0.970795  | -0.001183 |
| N | -5.303077 | 0.071845  | -0.008008 |
| C | -5.135186 | 2.569613  | 0.000794  |
| H | -5.778744 | 2.690439  | 0.887719  |
| H | -4.350278 | 3.336456  | 0.009307  |
| H | -5.766867 | 2.698682  | -0.89354  |
| O | -4.834869 | -2.229671 | -0.014526 |
| C | -6.761706 | 0.032453  | -0.006001 |
| H | -7.155778 | 0.503866  | 0.905147  |
| H | -7.157762 | 0.547624  | -0.892081 |
| H | -7.064804 | -1.021659 | -0.031539 |
| H | 2.506738  | -2.366979 | -0.0514   |
| H | 1.578491  | 1.864005  | 0.02644   |
| O | 3.857288  | 2.055197  | 1.888813  |
| H | 3.73165   | 1.370958  | 1.188321  |
| H | 2.950513  | 2.288448  | 2.137101  |
| O | 4.734277  | -1.59944  | -1.833119 |
| H | 5.6446    | -1.267514 | -1.843754 |
| H | 4.292479  | -1.019786 | -1.167132 |
| O | 6.397368  | 0.785007  | -0.018807 |
| H | 6.434335  | 1.395776  | 0.732674  |
| H | 5.467593  | 0.500589  | -0.021137 |
| O | 4.581288  | -1.578028 | 1.928647  |
| H | 4.430528  | -2.471507 | 1.586311  |
| H | 4.22873   | -0.998498 | 1.211546  |
| O | 3.771196  | 2.072248  | -1.905926 |
| H | 4.722679  | 2.129392  | -2.077681 |
| H | 3.709108  | 1.379992  | -1.205043 |

Z-pHBDI<sup>-</sup> – s2

|   |           |           |           |
|---|-----------|-----------|-----------|
| C | -3.134278 | -0.281425 | 0.18122   |
| C | -2.752775 | 1.017188  | 0.63914   |
| C | -1.409437 | 1.399439  | 0.684666  |
| C | -0.372399 | 0.509197  | 0.283359  |
| C | -0.743814 | -0.784187 | -0.185346 |
| C | -2.087261 | -1.162697 | -0.235932 |
| H | -1.138504 | 2.401448  | 1.036909  |
| H | 0.025944  | -1.480205 | -0.522798 |
| C | 0.988453  | 0.984845  | 0.36343   |
| H | 1.110342  | 2.038866  | 0.646064  |
| O | -4.408784 | -0.654735 | 0.130636  |
| C | 2.175398  | 0.318835  | 0.149519  |
| C | 3.48484   | 0.996365  | 0.235396  |
| C | 3.686175  | -1.199199 | -0.226925 |
| N | 2.373557  | -1.043627 | -0.148818 |
| N | 4.392992  | -0.017972 | -0.018166 |
| C | 4.391951  | -2.481292 | -0.491018 |
| H | 5.0539    | -2.732072 | 0.354285  |
| H | 3.654073  | -3.281352 | -0.631361 |
| H | 5.016281  | -2.394234 | -1.395115 |
| O | 3.773215  | 2.196065  | 0.463989  |
| C | 5.845169  | 0.130491  | -0.040426 |
| H | 6.29947   | -0.426102 | 0.791116  |
| H | 6.244766  | -0.234734 | -0.996028 |
| H | 6.070834  | 1.198699  | 0.066178  |
| H | -3.536177 | 1.714112  | 0.954999  |
| H | -2.362372 | -2.158744 | -0.59909  |
| O | 1.223667  | -3.378433 | 1.039833  |
| H | 1.574976  | -2.57455  | 0.593285  |
| H | 2.025531  | -3.87037  | 1.271921  |
| O | -5.776096 | 1.347861  | -1.128435 |
| H | -5.833249 | 2.068885  | -0.484233 |
| H | -5.290493 | 0.638573  | -0.637446 |
| O | 2.224823  | 3.885304  | -1.200548 |
| H | 1.318247  | 3.54454   | -1.175143 |
| H | 2.706691  | 3.298883  | -0.581262 |
| O | -5.781344 | 0.257946  | 2.280711  |
| H | -5.818995 | 1.218927  | 2.166045  |
| H | -5.275003 | -0.048876 | 1.484704  |
| O | -4.943413 | -1.852683 | -2.240641 |
| H | -5.402501 | -1.146268 | -2.718541 |
| H | -4.738279 | -1.440208 | -1.362454 |

Z-26Me<sup>-</sup> - s1

|   |           |           |           |
|---|-----------|-----------|-----------|
| C | 4.584224  | 0.821855  | 0.309011  |
| C | 4.446034  | -1.16067  | -0.758619 |
| C | 3.182155  | 0.349987  | 0.142081  |
| C | 4.965734  | -2.358557 | -1.470356 |
| H | 5.614464  | -2.946661 | -0.800421 |
| H | 4.124344  | -2.979198 | -1.803335 |
| H | 5.568964  | -2.053309 | -2.340939 |
| C | 6.783187  | -0.206758 | -0.392602 |
| H | 7.080405  | -0.056993 | -1.440411 |
| H | 7.178836  | 0.613169  | 0.219975  |
| H | 7.183533  | -1.161151 | -0.025412 |
| N | 3.174148  | -0.888094 | -0.534689 |
| N | 5.329653  | -0.193663 | -0.263532 |
| C | 2.093536  | 1.084104  | 0.528446  |
| H | 2.319888  | 2.091623  | 0.903112  |
| C | 0.692252  | 0.671143  | 0.445888  |
| C | 0.236204  | -0.589667 | 0.933676  |
| C | -0.244189 | 1.603299  | -0.097062 |
| C | -1.131929 | -0.904254 | 0.825259  |
| C | -1.595673 | 1.243746  | -0.209078 |
| C | -2.071877 | -0.018656 | 0.239054  |
| H | -1.496867 | -1.859367 | 1.221847  |
| H | -2.309749 | 1.949485  | -0.649565 |
| O | 5.032668  | 1.861651  | 0.832067  |
| C | 0.225454  | 2.954352  | -0.593695 |
| H | 0.691669  | 3.538784  | 0.218302  |
| H | 0.978464  | 2.84778   | -1.392491 |
| H | -0.622362 | 3.533297  | -0.990305 |
| C | 1.145336  | -1.568036 | 1.649446  |
| H | 1.564224  | -2.313549 | 0.955959  |
| H | 1.992162  | -1.054516 | 2.130802  |
| H | 0.574033  | -2.104542 | 2.42369   |
| O | -3.369919 | -0.347054 | 0.134117  |
| O | -5.19599  | 1.578154  | 0.346944  |
| H | -4.444277 | 0.924005  | 0.264061  |
| H | -4.924682 | 2.316694  | -0.219241 |
| O | -5.236322 | -2.336053 | -0.318954 |
| H | -4.446798 | -1.790129 | -0.112141 |
| H | -5.855479 | -1.661693 | -0.663722 |
| O | -6.772361 | -0.090383 | -1.259774 |
| H | -7.701871 | -0.025634 | -0.994982 |
| H | -6.306777 | 0.550261  | -0.673926 |
| O | -4.065388 | -0.798017 | 2.733372  |
| H | -3.850298 | -0.658636 | 1.777023  |
| H | -4.980544 | -0.489766 | 2.80577   |
| O | -3.97165  | 0.007799  | -2.523471 |
| H | -3.749031 | -0.121349 | -1.568403 |
| H | -4.939847 | -0.056411 | -2.520801 |

Z-26Me<sup>-</sup> - s2

|   |           |           |           |
|---|-----------|-----------|-----------|
| C | 3.590506  | 0.559113  | 0.541768  |
| C | 3.348205  | -1.537558 | -0.249633 |
| C | 2.17299   | 0.210787  | 0.278543  |
| C | 3.787955  | -2.874492 | -0.728259 |
| H | 4.273543  | -3.429284 | 0.091304  |
| H | 2.914637  | -3.435609 | -1.084981 |
| H | 4.520444  | -2.76632  | -1.544519 |
| C | 5.72196   | -0.768403 | 0.266309  |
| H | 6.140903  | -0.797163 | -0.749514 |
| H | 6.138392  | 0.087908  | 0.811229  |
| H | 5.968952  | -1.696416 | 0.798551  |
| N | 2.101879  | -1.104581 | -0.219839 |
| N | 4.272701  | -0.597855 | 0.216788  |
| C | 1.120559  | 1.07313   | 0.436537  |
| H | 1.386772  | 2.107491  | 0.688943  |
| C | -0.286097 | 0.728013  | 0.253644  |
| C | -0.870412 | -0.435065 | 0.839336  |
| C | -1.09524  | 1.617836  | -0.517834 |
| C | -2.230838 | -0.701879 | 0.602336  |
| C | -2.44013  | 1.300557  | -0.756218 |
| C | -3.04259  | 0.129667  | -0.215112 |
| H | -2.693733 | -1.575302 | 1.076289  |
| H | -3.04869  | 1.966394  | -1.379239 |
| O | 4.10065   | 1.621403  | 0.961243  |
| C | -0.488332 | 2.86702   | -1.121099 |
| H | -0.071474 | 3.525549  | -0.339909 |
| H | 0.33495   | 2.619817  | -1.812048 |
| H | -1.250671 | 3.433569  | -1.677269 |
| C | -0.118246 | -1.342324 | 1.792608  |
| H | 0.316195  | -2.209633 | 1.271428  |
| H | 0.705446  | -0.810786 | 2.294096  |
| H | -0.809442 | -1.720657 | 2.562561  |
| O | -4.331979 | -0.161564 | -0.444343 |
| O | -5.756171 | 2.115364  | -0.219254 |
| H | -5.224838 | 1.281139  | -0.329821 |
| H | -5.079059 | 2.80587   | -0.16434  |
| O | -4.621012 | -2.790407 | -0.93025  |
| H | -4.49288  | -1.818008 | -0.762024 |
| H | -4.259013 | -2.922497 | -1.818411 |
| O | 3.102975  | 3.84905   | -0.504065 |
| H | 3.416438  | 3.096626  | 0.037517  |
| H | 3.910601  | 4.357018  | -0.670822 |
| O | -5.417512 | -0.73047  | 1.963875  |
| H | -5.030623 | -0.529474 | 1.070451  |
| H | -6.176877 | -0.132314 | 2.021755  |
| O | 0.063977  | -2.571816 | -1.540741 |
| H | 0.733825  | -2.043575 | -1.042182 |
| H | 0.604973  | -3.088182 | -2.156957 |

Z-35Me<sup>-</sup> – s1

|   |           |           |           |
|---|-----------|-----------|-----------|
| C | -4.674504 | -1.194446 | -0.159748 |
| C | -4.929518 | 0.990992  | 0.339199  |
| C | -3.383316 | -0.473598 | -0.076674 |
| C | -5.677525 | 2.236376  | 0.659147  |
| H | -6.259566 | 2.105298  | 1.586312  |
| H | -4.969675 | 3.065352  | 0.786077  |
| H | -6.384963 | 2.477161  | -0.151405 |
| C | -7.05477  | -0.396007 | 0.154343  |
| H | -7.539488 | 0.195228  | -0.635326 |
| H | -7.254458 | -1.461714 | -0.013737 |
| H | -7.451774 | -0.100971 | 1.135487  |
| N | -3.615153 | 0.882505  | 0.236351  |
| N | -5.608708 | -0.207165 | 0.117653  |
| C | -2.179966 | -1.110714 | -0.288683 |
| H | -2.27657  | -2.180457 | -0.520642 |
| C | -0.828959 | -0.599112 | -0.25363  |
| C | -0.494422 | 0.754779  | 0.031324  |
| C | 0.230684  | -1.511662 | -0.521241 |
| C | 0.838897  | 1.182863  | 0.049697  |
| C | 1.573116  | -1.110993 | -0.510668 |
| C | 1.89661   | 0.253642  | -0.221599 |
| O | -4.930541 | -2.393666 | -0.41198  |
| O | 3.16627   | 0.656801  | -0.204288 |
| H | -0.015458 | -2.55791  | -0.742758 |
| C | 2.692272  | -2.081015 | -0.798506 |
| H | 3.281276  | -1.750189 | -1.669957 |
| H | 3.385748  | -2.145621 | 0.056166  |
| H | 2.290468  | -3.084845 | -1.00453  |
| C | 1.200782  | 2.615719  | 0.352943  |
| H | 0.294721  | 3.214407  | 0.53065   |
| H | 1.845218  | 2.675048  | 1.245983  |
| H | 1.76346   | 3.062874  | -0.483669 |
| H | -1.291873 | 1.472325  | 0.239427  |
| O | 3.840734  | -0.21937  | 2.354685  |
| H | 4.438497  | -0.966789 | 2.163209  |
| H | 3.627041  | 0.125403  | 1.458237  |
| O | 5.701843  | -0.411453 | -0.550146 |
| H | 4.76519   | -0.11887  | -0.474337 |
| H | 5.765888  | -1.099966 | 0.137989  |
| O | 3.592418  | 1.195128  | -2.857841 |
| H | 4.141033  | 0.454158  | -3.155477 |
| H | 3.462582  | 1.007245  | -1.897138 |
| O | 5.618889  | -2.363123 | 1.583274  |
| H | 5.149777  | -3.174478 | 1.336061  |
| H | 6.367916  | -2.674977 | 2.113251  |
| O | 4.600695  | 2.883235  | 0.394097  |
| H | 5.472437  | 2.476234  | 0.282057  |
| H | 3.980837  | 2.137305  | 0.202215  |

Z-35Me<sup>-</sup> – s2

|   |           |           |           |
|---|-----------|-----------|-----------|
| C | -3.832753 | -0.915675 | -0.099614 |
| C | -3.950382 | 1.30548   | 0.26767   |
| C | -2.498226 | -0.2965   | 0.020169  |
| C | -4.603646 | 2.629483  | 0.448769  |
| H | -5.305126 | 2.597381  | 1.298215  |
| H | -3.83662  | 3.392024  | 0.634634  |
| H | -5.177753 | 2.897153  | -0.453865 |
| C | -6.159047 | 0.066911  | 0.05098   |
| H | -6.568357 | 0.776646  | -0.680515 |
| H | -6.428299 | -0.955515 | -0.241542 |
| H | -6.567087 | 0.282765  | 1.04845   |
| N | -2.644731 | 1.085519  | 0.253656  |
| N | -4.701971 | 0.152186  | 0.067691  |
| C | -1.329182 | -1.018426 | -0.106292 |
| H | -1.479557 | -2.080486 | -0.339099 |
| C | 0.043342  | -0.594571 | 0.005065  |
| C | 0.452606  | 0.706445  | 0.413872  |
| C | 1.05395   | -1.549767 | -0.305106 |
| C | 1.806946  | 1.048766  | 0.492721  |
| C | 2.416048  | -1.2324   | -0.245079 |
| C | 2.819459  | 0.086294  | 0.151553  |
| O | -4.180986 | -2.104995 | -0.297184 |
| O | 4.10305   | 0.416453  | 0.227782  |
| H | 0.749289  | -2.560528 | -0.605415 |
| C | 3.474459  | -2.250194 | -0.593015 |
| H | 4.055815  | -1.925334 | -1.471904 |
| H | 4.185532  | -2.380867 | 0.239452  |
| H | 3.01358   | -3.223569 | -0.820153 |
| C | 2.235582  | 2.422129  | 0.947673  |
| H | 1.3577    | 3.031888  | 1.210032  |
| H | 2.89668   | 2.354023  | 1.827834  |
| H | 2.801325  | 2.942126  | 0.15737   |
| H | -0.299454 | 1.447546  | 0.69218   |
| O | 4.932098  | -0.769983 | 2.534197  |
| H | 5.20209   | -1.664557 | 2.279073  |
| H | 4.660117  | -0.358949 | 1.676038  |
| O | 6.434526  | -0.551167 | -0.783117 |
| H | 6.335161  | -1.465429 | -1.085745 |
| H | 5.531881  | -0.314246 | -0.454342 |
| O | 4.575602  | 2.243402  | -1.736004 |
| H | 5.256763  | 1.802983  | -2.264947 |
| H | 4.410794  | 1.605206  | -0.997413 |
| O | -1.334235 | 3.330344  | -0.944369 |
| H | -2.098807 | 3.839947  | -1.251889 |
| H | -1.744963 | 2.555251  | -0.496781 |
| O | -2.790364 | -4.527792 | -0.281677 |
| H | -3.180697 | -3.627868 | -0.283591 |
| H | -1.835565 | -4.369489 | -0.318728 |

Z-35Bu<sup>-</sup> - s1

|   |           |           |           |   |          |           |           |
|---|-----------|-----------|-----------|---|----------|-----------|-----------|
| C | -5.286963 | -1.025513 | -0.003568 | O | 4.933805 | 1.408958  | 0.60812   |
| C | -5.264283 | 1.231027  | 0.000765  | H | 4.828576 | 2.365467  | 0.431904  |
| C | -3.916534 | -0.471246 | -0.020031 | H | 4.054045 | 1.018573  | 0.407832  |
| C | -5.845334 | 2.600758  | 0.014168  | O | 2.803081 | -0.196541 | 2.852741  |
| H | -6.463084 | 2.746176  | 0.915797  | H | 2.615238 | 0.720942  | 3.099518  |
| H | -5.034908 | 3.340818  | 0.002972  | H | 2.814505 | -0.1693   | 1.868953  |
| H | -6.492979 | 2.751699  | -0.865246 | O | 4.081528 | 0.149606  | -2.425466 |
| C | -7.548225 | 0.112455  | 0.027813  | H | 4.965578 | 0.39987   | -2.118202 |
| H | -7.940742 | 0.61303   | -0.868394 | H | 3.577434 | 0.043254  | -1.584891 |
| H | -7.883946 | -0.931989 | 0.038028  | O | 5.825788 | -1.228746 | 0.088447  |
| H | -7.916572 | 0.622615  | 0.928847  | H | 4.901099 | -1.410508 | -0.143482 |
| N | -3.973462 | 0.938321  | -0.016831 | H | 5.794621 | -0.266652 | 0.251256  |
| N | -6.089463 | 0.107474  | 0.008887  | O | 4.54425  | 4.194634  | 0.082521  |
| C | -2.798776 | -1.280865 | -0.03152  | H | 3.699187 | 4.010069  | -0.35636  |
| H | -3.02349  | -2.356851 | -0.025594 | H | 5.129624 | 4.442212  | -0.649804 |
| C | -1.39917  | -0.93357  | -0.049443 |   |          |           |           |
| C | -0.918098 | 0.399763  | -0.077513 |   |          |           |           |
| C | -0.44732  | -1.985785 | -0.05113  |   |          |           |           |
| C | 0.451298  | 0.702588  | -0.085508 |   |          |           |           |
| C | 0.937363  | -1.753527 | -0.057731 |   |          |           |           |
| C | 1.425761  | -0.380828 | -0.047868 |   |          |           |           |
| O | -5.696445 | -2.210352 | -0.00114  |   |          |           |           |
| O | 2.724132  | -0.132474 | 0.016264  |   |          |           |           |
| H | -0.833575 | -3.00824  | -0.046609 |   |          |           |           |
| C | 1.898269  | -2.953839 | -0.090879 |   |          |           |           |
| C | 0.870879  | 2.182364  | -0.134626 |   |          |           |           |
| H | -1.657815 | 1.197162  | -0.096441 |   |          |           |           |
| C | 1.144937  | -4.296914 | -0.102921 |   |          |           |           |
| H | 0.535882  | -4.436954 | 0.80541   |   |          |           |           |
| H | 0.490445  | -4.394279 | -0.984844 |   |          |           |           |
| H | 1.888871  | -5.11023  | -0.140746 |   |          |           |           |
| C | 2.742828  | -2.906166 | -1.378655 |   |          |           |           |
| H | 3.330758  | -1.984333 | -1.445092 |   |          |           |           |
| H | 3.432599  | -3.767965 | -1.407011 |   |          |           |           |
| H | 2.088278  | -2.960203 | -2.265561 |   |          |           |           |
| C | 2.811816  | -2.973346 | 1.151085  |   |          |           |           |
| H | 3.464709  | -3.862802 | 1.110975  |   |          |           |           |
| H | 3.445211  | -2.081109 | 1.210875  |   |          |           |           |
| H | 2.206075  | -3.034295 | 2.070723  |   |          |           |           |
| C | -0.344691 | 3.119661  | -0.281335 |   |          |           |           |
| H | -1.029823 | 3.051091  | 0.579553  |   |          |           |           |
| H | 0.024576  | 4.157351  | -0.335391 |   |          |           |           |
| H | -0.914684 | 2.911227  | -1.202406 |   |          |           |           |
| C | 1.590785  | 2.587691  | 1.167632  |   |          |           |           |
| H | 1.839795  | 3.662745  | 1.134162  |   |          |           |           |
| H | 0.933649  | 2.416592  | 2.037366  |   |          |           |           |
| H | 2.520786  | 2.026803  | 1.311554  |   |          |           |           |
| C | 1.782273  | 2.444164  | -1.349625 |   |          |           |           |
| H | 2.745483  | 1.932607  | -1.250768 |   |          |           |           |
| H | 1.296014  | 2.099765  | -2.278431 |   |          |           |           |
| H | 1.959049  | 3.531166  | -1.451404 |   |          |           |           |



Z-35Bu<sup>-</sup> - s2

|   |           |           |           |   |           |           |           |
|---|-----------|-----------|-----------|---|-----------|-----------|-----------|
| C | 4.520654  | 0.86237   | -0.12156  | O | -5.500559 | -1.949047 | 0.640964  |
| C | 4.51722   | -1.392741 | -0.136343 | H | -5.203895 | -2.869677 | 0.586682  |
| C | 3.15675   | 0.306232  | -0.141897 | H | -4.69167  | -1.433348 | 0.426541  |
| C | 5.092213  | -2.763875 | -0.098368 | O | -3.283487 | -0.330947 | 2.850951  |
| H | 5.695194  | -2.899479 | 0.814836  | H | -3.008887 | -1.249872 | 2.986665  |
| H | 4.277471  | -3.499264 | -0.112832 | H | -3.382095 | -0.265651 | 1.87403   |
| H | 5.751966  | -2.9286   | -0.965949 | O | -5.466931 | -0.052402 | -1.848901 |
| C | 6.790159  | -0.260687 | -0.104053 | H | -5.927069 | -0.868244 | -1.59975  |
| H | 7.184782  | -0.774968 | -0.991159 | H | -4.700697 | -0.045223 | -1.227367 |
| H | 7.119063  | 0.785659  | -0.111248 | O | 1.913424  | -2.604299 | 1.888093  |
| H | 7.157571  | -0.754201 | 0.806427  | H | 2.298686  | -2.120138 | 1.122382  |
| N | 3.225065  | -1.100863 | -0.157772 | H | 2.694264  | -2.971585 | 2.329616  |
| N | 5.330625  | -0.265629 | -0.127483 | O | 3.644341  | 4.520133  | -0.132743 |
| C | 2.021785  | 1.094066  | -0.11789  | H | 2.712043  | 4.408751  | -0.370066 |
| H | 2.218851  | 2.171636  | -0.049311 | H | 4.000781  | 3.605703  | -0.137442 |
| C | 0.635736  | 0.716153  | -0.154606 |   |           |           |           |
| C | 0.177901  | -0.610815 | -0.365036 |   |           |           |           |
| C | -0.333235 | 1.744944  | -0.000895 |   |           |           |           |
| C | -1.185322 | -0.932227 | -0.372166 |   |           |           |           |
| C | -1.71059  | 1.486636  | 0.011939  |   |           |           |           |
| C | -2.16857  | 0.110388  | -0.112913 |   |           |           |           |
| O | 4.937306  | 2.048024  | -0.108098 |   |           |           |           |
| O | -3.446672 | -0.18029  | 0.027557  |   |           |           |           |
| H | 0.040202  | 2.766016  | 0.115581  |   |           |           |           |
| C | -2.704374 | 2.656914  | 0.099822  |   |           |           |           |
| C | -1.608304 | -2.388672 | -0.616208 |   |           |           |           |
| H | 0.922825  | -1.385927 | -0.533951 |   |           |           |           |
| C | -1.986929 | 4.005275  | 0.300235  |   |           |           |           |
| H | -1.409976 | 4.026321  | 1.240069  |   |           |           |           |
| H | -1.307901 | 4.242162  | -0.535    |   |           |           |           |
| H | -2.748784 | 4.80099   | 0.349972  |   |           |           |           |
| C | -3.470075 | 2.744744  | -1.236315 |   |           |           |           |
| H | -4.006395 | 1.814132  | -1.457042 |   |           |           |           |
| H | -4.204508 | 3.5682    | -1.195773 |   |           |           |           |
| H | -2.768476 | 2.948761  | -2.062952 |   |           |           |           |
| C | -3.697795 | 2.506933  | 1.271392  |   |           |           |           |
| H | -4.330386 | 3.410366  | 1.320808  |   |           |           |           |
| H | -4.347291 | 1.631432  | 1.150059  |   |           |           |           |
| H | -3.156488 | 2.41787   | 2.2278    |   |           |           |           |
| C | -0.423307 | -3.260904 | -1.074532 |   |           |           |           |
| H | 0.358402  | -3.342283 | -0.302952 |   |           |           |           |
| H | -0.798864 | -4.277364 | -1.280505 |   |           |           |           |
| H | 0.033457  | -2.870471 | -1.999733 |   |           |           |           |
| C | -2.140239 | -2.997992 | 0.696953  |   |           |           |           |
| H | -2.467662 | -4.038346 | 0.523099  |   |           |           |           |
| H | -1.341761 | -3.010009 | 1.458197  |   |           |           |           |
| H | -2.988776 | -2.428888 | 1.093891  |   |           |           |           |
| C | -2.674714 | -2.47447  | -1.727497 |   |           |           |           |
| H | -3.593282 | -1.941187 | -1.459857 |   |           |           |           |
| H | -2.281082 | -2.046836 | -2.666035 |   |           |           |           |
| H | -2.922602 | -3.534002 | -1.913891 |   |           |           |           |

## Notes and references

- 1 J. Conyard, M. Kondo, I. A. Heisler, G. Jones, A. Baldrige, L. M. Tolbert, K. M. Solntsev and S. R. Meech, *J. Phys. Chem. B*, 2011, **115**, 1571–1577.
- 2 E. K. Ashworth, M. H. Stockett, C. Kjær, P. C. B. Page, S. R. Meech, S. B. Nielsen and J. N. Bull, *J. Phys. Chem. A*, 2022, **126**, 1158–1167.
